# Supplementary material
Source: PubMed Central journal article supplement (PMC3491501)

## Supplementary Information

### The genome sequence of the Button Mushroom *Agaricus bisporus* reveals mechanisms governing adaptation to a humic-rich ecological niche

#### 1. Supplementary Information Text

- 1.1. Genome Sequencing & Assembly
- 1.2. Anchoring the assembly on the genetic map
- 1.3. Transposable Elements & Simple Sequence Repeats
- 1.4. Genome annotation
- 1.5. EST Sequencing, Clustering, and Assembly
- 1.6. Transcriptome analysis
- 1.7. Growth and utilization of carbohydrates
- 1.8. Prediction of CAZymes
- 1.9. Genome comparisons between *A. bisporus* var. *bisporus* and *A. bisporus* var. *burnettii*

#### 2. References

Tables S1 to S16

Figures S1 to S14

## 1. Supplementary Information Text

### 1.1. Genome Sequencing & Assembly

*Agaricus bisporus* var. *bisporus* H97 (homokaryon) was sequenced using Sanger sequencing on ABI 3730XL capillary machines. Three different sized libraries were used as templates for the plasmid subclone sequencing process and both ends were sequenced. 191,136 reads from the 2.9 kb sized library, 179,424 reads from the 6.4 kb sized library, and 36,192 reads from a 39.6 kb fosmids library were sequenced. A total of 406,752 reads were assembled using a modified version of Arachne (1) v.20071016 with parameters maxcliq1=100, correct1\_passes=0 and BINGE\_AND\_PURGE=True. This produced 33 scaffold sequences, with L50 of 2.4 Mb, 18 scaffolds larger than 100 kb, and total scaffold size of 30.4 Mb. Two scaffold breaks were made based on integration of a genetic map. Each scaffold was screened against bacterial proteins, organelle sequences and GenBank using megablast against Genbank NR and blastp against a set of known microbial proteins. No scaffolds were identified as contamination. We classified additional scaffolds as unanchored rDNA (18), mitochondrion (1), and small repetitive (3). Additional scaffolds were removed if they consisted of greater than 95% 24mers that occurred 4 other times in the scaffolds larger than 50kb or if the scaffold contained only unanchored rDNA sequences. We also excluded 2 scaffolds smaller than 1 kb. The final assembly contains 29 scaffolds that cover 30.0 Mb of the genome with a contig L50 of 262.5 kb and a scaffold L50 of 2.3 Mb (Table S1)

*Agaricus bisporus* var. *burnettii* JB137-S8 (homokaryon) genome was sequenced using a combination of 454 (Roche) and Illumina sequencing platforms. All general aspects of library construction and sequencing can be found at the JGI website (<http://jgi.doe.gov>). The Illumina reads were quality trimmed to 57 bp based on an average quality per base position plot, randomly subsetted to 50X coverage depth, assembled as unpaired data with the Velvet assembler version 0.7.34 (2) with a hash length of 31, and the resulting contigs greater than or equal to 800bp in length were shredded into 1000bp chunks, if possible, with 800bp overlap. Reverse complemented shreds were also created at contig ends. 454 data and shredded Velvet assembled Illumina consensus, screened for contamination, were assembled with the Newbler assembler version 2.3-PreRelease-10/20/2009 to produce a draft with a final assembled coverage of 46X. The assembly was improved using one round of automated gap closure using gapResolution (DOE Joint Genome Institute <http://jgi.doe.gov>), which resulted in 131 closed gaps. The consensus of the closed gaps was stitched into the assembly and it was further improved using synteny to *Agaricus bisporus* H97\_2 using Nucmer and mummerplot (3). 15 joins were identified and manually made with 600bp of gap in between each manual join. This resulted in a final improved assembly with 2016 scaffolds with an N/L50 of 8/1.23Mb, up from 2030 scaffolds with an N/L50 of 14/0.56Mb (Table S1).

The genome sequences have been deposited in the GenBank database [accession nos. AEOK00000000 (*A. bisporus* var. *bisporus* H97) and AEOL00000000 (*A. bisporus* var. *burnettii*)].

### 1.2. Anchoring the assembly on the genetic map

The linkage mapping data used for the scaffolds chromosome assignment was described in Foulongne-Oriol *et al.* (4, 5). This map was constructed from a haploid progeny derived from an intervarietal *A. bisporus* var. *bisporus* (U1-7) x *A. bisporus* var. *burnettii* (Jb3-83) hybrid. The *A. bisporus* linkage map was assumed to cover most of the genome of *A. bisporus* (4). Linkage groups (LGs) were assigned to chromosomes according to the

literature (6; 7). The markers for which sequences are publicly available were located on scaffolds with BLASTN (8). The genetic map and the genome assemblies were manually aligned. Maps are scaled to represent the relative physical length of each chromosome.

Ninety-two sequenced markers made possible the scaffold assignment (Fig. S1). The number of anchored markers ranged from two (LG XIII) to 11 (LG II, LG III) per chromosome. In total *ca.* 30 MB of the genome sequence (99 %) could be assigned to chromosomes. Most of the scaffolds could be genetically oriented, excepted scaffold 17, scaffold 18 and scaffold 19 for which only one marker could be aligned. The majority of the mapped markers were collinear with the sequence assembly. Inconsistencies were observed on LG I (scaffold 1). Scaffold 4 was split in two with one part assigned to LG II, and the other one to LG IV. Scaffold 29 included the rDNA repeats. On the linkage map, one rDNA tandem repeat locus was located on the distal part of LG IX.

The ratio of physical lengths to genetic distances averaged 33 kbp/cM. According to 77 segments bounded by two successive anchor markers, the physical length was correlated with the genetic distance ( $r = 0.28$ ,  $p = 0.0033$ ).

### 1.3. Transposable Elements & Simple Sequence Repeats

RepeatScout (9) was used to identify *de novo* repetitive DNA in the *A. bisporus* H97 genome. The default parameters (with  $l = 15$ ) were used. RepeatScout generated a library of 755 consensus sequences. This library was then filtered as follows: 1) all the sequences less than 100 bp in size were discarded; 2) repeats having less than five copies in the genome were removed (as they may correspond to protein-coding gene families) and 3) repeats having significant hits to known proteins in UNIPROT (The UNIPROT consortium, 2008) other than proteins known as belonging to TEs were removed. The 216 consensus sequences remaining were annotated manually by a TBLASTX search (8) against RepBase (10); 32 consensus sequences showed homologies with Class 1 retrotransposons and 13 with Class 2 transposons (Fig. S3). The remaining 171 consensus sequences were not categorized. To identify full length LTR retrotransposons, a second *de novo* search was performed with LTR\_STRUC (11). The program yielded 36 full-length candidates LTR retrotransposon sequences, which were checked for their homology using the BLASTN algorithm (8) against the sequences coming from the RepBase database. Among the 36 putative full length LTRs, 15 were attributed to *Gypsy/Ty3*-like elements and 13 to *Copia/Ty1*-like. Eight other elements did not exhibit a significant homology with known TE families. These sequences have been excluded for further analyses. The insertion age of full length LTRs was determined from the evolutionary distance between 5'- and 3'-solo LTR derived from a ClustalW alignment of the two solo LTR sequences using the Kimura correction in ClustalW (12). For the conversion of the nucleotide sequence distance to putative genome insertion age, a substitution rate of  $1.3 \times 10^{-8}$  mutations per site per year was used (13). The number of TE occurrences and the percent of genome coverage were assessed by masking the genome assembly using RepeatMasker (14) with the 216 consensus sequences coming from the RepeatScout pipeline and the 28 coming from the LTR\_STRUC pipeline. RepeatMasker masked 11.17 % of the genome assembly; 3.76 % of the genome was masked by repeated elements belonging to unknown/uncategorized families and 3.5% by Class 1 retrotransposons *Gypsy* (Fig. S3).

MISA (<http://pgrc.ipk-gatersleben.de/misa/>) with default parameters was used to identify mono- to hexanucleotide simple sequence repeat (SSR) motifs. A total of 3,134 SSRs have been identified in the *A. bisporus* H97 genome corresponding to 2,030 mono-, 354 di-, 701 tri-, 22 tetra-, 10 penta- and 17

hexanucleotide motifs. The relative abundance of SSRs was calculated as the number of SSRs per Mb. For all 3,134 SSRs, the relative abundance was 104 SSRs/Mb.

#### 1.4. Genome Annotation

Both genomes were annotated using the JGI annotation pipeline, which takes multiple inputs (scaffolds, ESTs, and known genes) and runs several analytical tools for gene prediction and annotation, and deposits the results in the JGI Genome Portal (<http://jgi.doe.gov/Agaricus>) for further analysis and manual curation. Genomic assembly scaffolds were masked using RepeatMasker (14) and the RepBase library of 234 fungal repeats (10). tRNAs were predicted using tRNAscan-SE (15). Using the repeat-masked assembly, several gene prediction programs falling into three general categories were used: 1) *ab initio* - FGENESH (16); GeneMark (17), 2) *homology-based* - FGENESH+; Genewise (18) seeded by BLASTx alignments against GenBank's database of non-redundant proteins (NR: <http://www.ncbi.nlm.nih.gov/BLAST/>), and 3) *EST-based* - EST\_map (<http://www.softberry.com/>) seeded by *A. bisporus* H97 EST contigs. Genewise models were extended whenever possible using scaffolds data to find start and stop codons. EST BLAT alignments (19) were used to extend, verify, and complete the predicted gene models. The resulting set of models was then filtered for the best models, based on EST and homology support, to produce a non-redundant representative set. This representative set was subject to further analysis and manual curation. Measures of model quality include proportions of models complete (with start and stop codons) (>87% of models), consistent with ESTs (>61% of models covered over  $\geq 75\%$  of exon length), supported by similarity with proteins from the NCBI NR database (>83% of models). Quality metrics for gene models are summarized in Table S2.

All predicted gene models were functionally annotated using SignalP (20), TMHMM (21), InterProScan (22), BLASTp (8) against GenBank's database of non-redundant proteins, and hardware-accelerated double-affine Smith-Waterman alignments (deCypherSW; [http://www.timelogic.com/decypher\\_sw.html](http://www.timelogic.com/decypher_sw.html)) against SwissProt (<http://uniprot.org>), KEGG (23), and KOG (24). KEGG hits were used to assign EC numbers (<http://enzyme.expasy.org/>), and Interpro and SwissProt hits were used to map GO terms (<http://www.geneontology.org/>).

The different species chosen for multigene families prediction cover Agaricomycotina, Tremellomycetes, Pucciniomycotina and Ustilagomycotina phyla, with representatives from Agaricales, Boletales, Russulales, Polyporales, Tremellales, Pucciniales, Sporidiobolales, Ustilaginales and Malasseziales. Protein sets from *Agaricus bisporus* H97 (10,438 models), *Coprinus cinereus* okayama 7 (13,394 models), *Laccaria bicolor* (19,036 models), *Schizophyllum commune* (13,181 models), *Pleurotus ostreatus* PC15 (11,579 models), *Serpula lacrymans* (12,917 models), *Heterobasidion annosum* (12,193 models), *Postia placenta* (12,415 models), *Phanerochaete chrysosporium* (10,048 models), *Cryptococcus neoformans grubii* h99 (6,967 models), *Tremella mesenterica* (8,313 models), *Melampsora larici populina* (16,841 models), *Puccinia graminis* (18,241 models), *Sporobolomyces roseus* (5,536 models), *Ustilago maydis* (6,522 models) and *Malassezia globosa* (4,274 models) were retrieved from the Joint Genome Institute Portal and the Broad Institute Portal.

Multigene families were predicted from 181,895 predicted proteins found in *A. bisporus* and the other representatives using MCL algorithm (25) with inflation parameter set to 3.0. As a result, 5,058 protein families phylogenetically relevant (containing at least two species and 10 sequences) were identified. The *A. bisporus*

bigger gene families are coding for proteins containing a Cytochrome p450 domain, Protein kinase domain, GMC oxidoreductase or Fungal hydrophobin domain (Table S5).

Multigene families were analyzed for evolutionary changes in protein family size using the CAFE program (26) (Fig. S5). The program uses a random birth and death process to model gene gain and loss across a user specified tree structure. The distribution of family sizes generated under the random model provides a basis for assessing the significance of the observed family size differences among taxa (p-value <0.001). CAFE estimates for each branch in the tree whether a protein family has not changed, has expanded or contracted. A phylogenetic tree was constructed with 203 core genes representatives (FUNYBASE) of the following fungi: *A. bisporus* and other basidiomycetes.

In *A. bisporus*, 496 families were expanded, 3,811 showed no change and 751 families had undergone contraction by comparison to a putative common ancestor Basidiomycota having 5,058 gene families. Tables S6 and S7 present contracted and expanded gene families with lower p-value in *A. bisporus* genome, respectively. The PFAM domains for these families were associated by homology searches using hmmscan from HMMER3 package (27) and the PFAM database (28).

Manual curation of the automated annotations was performed through by using the web-based interactive editing tools of the JGI Genome Portal to assess predicted gene structures, assign gene functions, and report supporting evidence.

Secreted proteins were identified using a custom pipeline including the TargetP (<http://www.cbs.dtu.dk/services/TargetP/>) and SignalP (<http://www.cbs.dtu.dk/services/SignalP/>) algorithms (20, 29). The secreted peptidases were identified in the genome using the MEROPS database (30; <http://merops.sanger.ac.uk>).

The gene models coding for membrane transporters were identified and curated by using the Transport Classification Database (TCD) (31; <http://www.tcdb.org/>). This approach combines BLAST searches against a curated membrane transport protein database (TCD), as well as HMM searches and COG-based searches against membrane transporter protein families. Membrane transporters were assigned to protein families based on sequence similarities.

### **1.5. EST Sequencing, Clustering, and Assembly**

Total RNA of *A. bisporus* var. *bisporus* strain U1 (heterokaryon) was used to extract PolyA<sup>+</sup> RNA using oligo (DT) magnetic beads (Absolutely mRNA™ Purification kit, Stratagene). PolyA RNA was reverse transcribed using Superscript III (Invitrogen) using a dT<sub>15</sub>VN<sub>2</sub> primer. Second strand cDNA was synthesized by nick translation with *E. coli* DNA ligase, *E. coli* DNA polymerase I, and RNase H and blunt end repaired using T4 polymerase (Invitrogen). The dsDNA was fragmented and 300-800 base pair fragments were gel purified using a 2% agarose gel. The purified fragments were then used to create the 454 single stranded cDNA library as described below (454 library preparation kit, Roche).

The fragment ends were polished using T4 ligase and T4 polynucleotide kinase (Roche). Adaptors containing primer sequences and a biotinylated tag were ligated to the fragment ends (Roche). The fragments with properly ligated adaptors were immobilized onto magnetic streptavidin-coated beads (Roche). Nicks or gaps between the adaptors and the dsDNA fragments were repaired using the fill-in polymerase (Roche). The non biotinylated

strands of the immobilized dscDNA fragments were melted off to generate the single stranded cDNA library for 454 sequencing.

The ESTs were evaluated for the presence of polyA tails (which if present were removed) then evaluated for length, removing ESTs with fewer than 50 bases remaining. Additionally, ESTs consisting of more than 50% low complexity sequence were removed from the final set of ESTs. For clustering, ESTs were evaluated with *malign* (JGI tool), a kmer based alignment tool, which clusters ESTs based on sequence overlap (kmer = 16, seed length requirement = 32 alignment ID  $\geq$  98%). EST clusters were then each assembled using CAP3 (32) to form consensus sequences.

Three separate RNA samples were used to generate libraries: vegetative, undifferentiated mycelium on casing and compost substrates, and fruiting bodies. They produced, respectively, 442,365, 291,949, and 405,357 ESTs. Together with 470 ESTs from external sources, they all were clustered and assembled into 79,271 consensus sequences and 42,693 singletons. ESTs have been submitted and released by NCBI Short Read Archive: Accession n° SRA037617.

### 1.6. Transcriptome analysis

Gene expressions were profiled in the commercial (heterokaryon) strain A15. Casing compost and fruit body samples were grown in standard conditions. The casing sample consisted of a mixture of mycelium aggregates and primordia. The culture samples refer to axenic culture and the media used was compost extract medium in agar plates (33). The 'Fruiting bodies' sample represents the mature mushroom fruit body (including the stipe, cap and *pilei pellis* (skin) tissues). The 'Compost' sample represents the mycelium growing in wheat straw compost. This mycelium is both fine (likely to be nutritional) and strands or cords (some secondary structure and thicker (clearly visible to the naked eye)). The 'Casing' sample consists of fine and stranded/corded mycelium, and stages to fruit body primordia (including aggregates and hyphal knots, undifferentiated and differentiated primordia). The main components of compost are wheat straw, horse and chicken manure, gypsum and soy meal. It originates from a pre-treatment that includes bacterial pre-digestion and also the presence of other fungi during cultivation. The samples for RNA extraction were collected on separate occasions from separate mushroom houses. Four biological replicates of each developmental stage were analyzed.

RNA was prepared from fruiting body and culture samples using a standard Trizol protocol. RNA was extracted from compost and casing samples using a method based on the FastRNA Pro Soil-Direct kit (MP Biochemicals). RNA was quantified using a NanoDrop-1000 spectrophotometer and quality was monitored with the Agilent 2100 Bioanalyzer (Agilent Technologies, Santa Clara, CA).

Custom arrays (Agilent ID 027120) were developed using 10,438 CDS (filtered model set) from the H97 v2 gene annotation; 5 x 60-mer oligos per CDS and the 8 x 60K randomised format were designed using the Agilent eArray software. Cyanine-3 (Cy3) labeled cRNA was prepared from 0.6 ug RNA using the Quick Amp Labelling kit (Agilent) according to the manufacturer's instructions, followed by RNAeasy column purification (QIAGEN, Valencia, CA). Dye incorporation and cRNA yield were checked with the NanoDrop ND-1000 Spectrophotometer. 600 ng of Cy3-labelled cRNA (specific activity  $>10.0$  pmol Cy3/ug cRNA) was fragmented at 60°C for 30 minutes in a reaction volume of 25  $\mu$ l containing 1x Agilent fragmentation buffer and 2x Agilent blocking agent following the manufacturers instructions. On completion of the fragmentation reaction, 25  $\mu$ l of

2x Agilent hybridization buffer was added to the fragmentation mixture and hybridized to Agilent arrays (ID 027120) for 17 hours at 65°C in a rotating Agilent hybridization oven. After hybridization, microarrays were washed 1 minute at room temperature with GE Wash Buffer 1 (Agilent) and 1 minute with 37°C GE Wash buffer 2 (Agilent) then 10 seconds in acetonitrile and 30 seconds in Stabilization and drying solution (Agilent). Slides were scanned immediately after washing on the Agilent's High-Resolution C Scanner (G2505C US94100321) using one color scan setting for 8 x 60K array slides (Scan resolution 3µm). The scanned images were analyzed with Feature Extraction Software (Agilent) using default parameters (protocol GE1\_107\_Sep09 and Grid: 027120\_D\_F\_20100129) to obtain background subtracted and spatially detrended Processed Signal intensities. Features flagged in Feature Extraction as Feature Non-uniform outliers were excluded.

Raw array data were Robust multichip average normalized using the ARRAYSTAR software (DNASTAR, Inc. Madison, WI, USA). A Student t-test with false discovery rate (FDR) multiple testing corrections was applied to the data using the ARRAYSTAR software (DNASTAR). Transcripts with a significant p-value (<0.05) were considered as differentially expressed. The complete expression dataset is available as series GSE39569 at the Gene Expression Omnibus at NCBI (<http://www.ncbi.nlm.nih.gov/geo/>). In addition a supplemental table summarizing the array data is available for download on <http://mycor.nancy.inra.fr/Agaricus/>.

Comparison of ratios of compost/culture transcript profiles was used to identify the most highly upregulated transcripts found in mycelium grown on compost during vegetative growth. To assess the effect of a humic environment on gene expression the ratio of humic/non-humic expression was calculated as: expression in compost/(average expression in culture, casing and fruitbodies). The comparison of compost/fruitbody transcript profiles highlights developmental stage differences during mushroom formation.

### **1.7. Growth and utilization of carbohydrates**

*Growth and utilization of carbohydrates.* Growth of *A. bisporus* was performed using minimal medium with the carbon sources as indicated in the text and at [www.fung-growth.org](http://www.fung-growth.org). Minimal medium consisted of 20.5 mM MOPS, 2 mM KH<sub>2</sub>PO<sub>4</sub>, 1 mM MgSO<sub>4</sub>, 0.5 mM CaCl<sub>2</sub>, 0.134 mM EDTA, 25 µM FeO<sub>4</sub>, 5 µM ZnSO<sub>4</sub>, 5 µM MnSO<sub>4</sub>, 4.8 µM H<sub>3</sub>BO<sub>3</sub>, 2.4 µM KI, 52 nM Na<sub>2</sub>MoO<sub>4</sub>, 4 nM CuSO<sub>4</sub>, 4 nM CoCl<sub>2</sub>, 0.5 µM thiamine.HCL, 0.1 µM D(+) biotine and 20 mM NH<sub>4</sub>CL and was set at pH 6.8. Carbon sources were added to a final concentration of 25 mM for monosaccharides and 1% for polysaccharides.

*A. bisporus var. bisporus* H97, H39 and their dikaryon U1 and *A. bisporus var. burnettii* JB137-s8 were grown on minimal medium containing 25 mM of the carbon sources as indicated in Fig S7. The commercial heterokaryon U1 was similar to H39 on most monosaccharides. U1 and H39 showed more dispersed growth on D-glucose, D-mannose, L-rhamnose, and better growth on D-xylose, L-arabinose and D-galacturonic acid than H97. U1 grew best on D-galactose, while less dispersed growth was observed for H97 and no growth for H39. *A. bisporus var. burnettii* JB137-s8 differed significantly from the other strains in that it grew best on D-glucose and D-mannose, with slower growth on D-galactose, D-xylose and L-arabinose, and only residual growth on L-rhamnose. It was not able to grow on D-galacturonic acid (Fig S7).

*Effect of humic acids on growth and utilization of carbohydrates.* Growth of *A. bisporus* was performed using minimal medium (see above) with the carbon sources and with adding humic extracts (Fig S7). Humic extracts were presented as a pine (cypress) soil extract and compost (phase II) extract and they were added to a final

concentration of 0.1%. *A. bisporus* var. *bisporus* H97, H39 and their dikaryon U1, *A. bisporus* var. *burnettii* JB137-s8 and the monokaryotic strain of *C. cinereus* were grown on minimal medium containing 25 mM of monosaccharides alone or with 0.1 % of humic extracts. The U1 heterokaryon grew similarly on most monosaccharides and polysaccharides with or without humic extracts, suggesting that the humic extracts do not stimulate vegetative mycelial growth under these conditions. On some carbon sources a small reduction in growth was observed in the presence of the cyprus litter extract (Fig S7). In contrast, growth of the monokaryons H97 and H39 was stimulated by the humic extracts, but the extent of this depended on the carbon source that was available. *A. bisporus* H97 grew better on glucose with addition of humic extracts. Growth of H39 was more dispersed on xylose, arabinose and glucose with pine soil and compost extracts than media without the extracts (Fig. S7). Both H97 and H39 grew better on guar gum, pectin, soluble starch and inulin when the extracts were added. This suggests a synergy between the presence of humic extracts and degradation of the hemicellulose analogue guar gum to stimulate colonization of the substrate. Overall the positive effect of the compost extract was stronger than the Cyprus litter extract, which is likely due to the adaptation of the commercial *A. bisporus* strains to this substrate.

### **1.8. Prediction of CAZymes and lignolytic oxidoreductases**

To determine whether *A. bisporus* sugar-cleaving capabilities resemble those of other fungi, we have undertaken a comparison of the glycoside hydrolases (GH) and polysaccharide lyases (PL) repertoires of 25 completely sequenced fungi (Fig. S8). For each fungus we have listed the number of representatives of each CAZy family (families defined in the CAZy database; [www.cazy.org](http://www.cazy.org); 34) and then performed a double clustering based on Bray-Curtis distances (i) between organisms according to their family distribution and (ii) between families according on their distribution pattern in the different genomes. Distances were computed using GINKGO (35) and the distance trees were constructed with FastME (36).

Then, we searched *A. bisporus* var *bisporus* and *A. bisporus* var *burnettii* proteomes for 27 gene families encoding oxidoreductases and carbohydrateactive enzymes (CAZymes) that are known to be implicated in wood decay (37)(Table S10). To estimate the significance of the observed family size differences among taxa, we performed an analysis using the CAFE program (26) with a p-value <0.001. To assess if *Agaricus bisporus* is sharing the same distribution for these 27 gene families with brown rot or white rot fungi, we carry out a Correspondance Analysis, with R package FactoMineR. (Fig. S10)

### **1.9. Genome comparisons between *A. bisporus* var. *bisporus* and *A. bisporus* var. *burnettii***

These two varieties differ in their ecology, modes of reproduction, and morphological characteristics. Understanding their genome structural differences could potentially help us to reveal the genetic basis for such differences and help to guide future hybridization and breeding programs. Segmental duplications were found for 54 genes and 31 genes in 15 and 9 blocks respectively for the var. *bisporus* and var. *burnettii* strains, with maximum 6 and 5 genes per block in the two strains. However, the amounts of tandem repeats were larger than segmental duplications. In the *A. bisporus* var. *bisporus* strain H97, 1083 genes were included in 363 tandems with 15 genes maximum for an individual repeat. A similar number was found in the var. *burnettii* strain with 1032 genes in 352 tandems with 9 genes maximum for an individual repeat. The tandem repeats include



cytochromes P450, aldo/keto-reductases, hydrophobins, coesterases, methyltransferases, GMC\_oxred, Cu-oxidases, Ricin\_B\_lectin (6-12 genes each). Several domains were found duplicated in only one of the two strains (eg, var. *burnettii*-specific NADH-ubiquinone/plastoquinone oxidoreductases and LAGLIDADG endonucleases). Over 390,000 SNPs were detected between the two strains with 40% in protein coding regions.

We compared the genome structures between strains H97 and JB137 based on their respectively assembled 29 and 2016 scaffolds. Because of the large difference in the number of scaffolds between the two assembled genomes (Fig. S2) and their incomplete correspondence with chromosomes and linkage groups, inferences about inter-chromosomal translocations between the genomes are not possible at present. Instead, our analysis is focused on comparing the unambiguously assembled scaffolds to identify the inversions and translocations between homologous scaffolds of the two strains. In this analysis, we first used each individual scaffold of strain H97 as a query to identify homologous sequences in strain JB137. The corresponding scaffold(s) in strain JB137 that matched each queried scaffold of strain H97 was recorded. Each matching scaffold pair between these two strains was then compared using the “Dot Plot” tab of the “Synteny” function at the JGI website to identify inversions and translocations.

A total of 74 one-to-one matching scaffold block pairs ranging from ~4.5kb to over 2.9 Mbp were identified between the two genomes. Within the 74 pairs of blocks, 12 were completely syntenic with no inversion or translocation, 30 contained both inversions and translocations, 5 contained only inversions, and 27 contained only translocations. The numbers of inversions and translocations between the two sequenced genomes of *A. bisporus* were significantly greater than those found between closely related strains in other species (38). Chromosomal size polymorphisms due to chromosomal rearrangements have also been observed among strains within the same variety, *A. bisporus* var. *bisporus* (39). Such rearrangements likely contribute to the relatively low rate of recombination and low viability of haploid meiotic spores from crosses involving parental strains from either within the same variety (6) or between the two different varieties (4).

## 2. References

1. Jaffe DB, Butler J, Gnerre1 S, Mauceli E, Lindblad-Toh K et al. (2003) Whole-genome sequence assembly for mammalian genomes: Arachne 2. *Genome Res* 13: 91-96.
2. Zerbino DR and Birney E (2008) Velvet: algorithms for *de novo* short read assembly using de Bruijn graphs. *Genome Res* 18: 821-829.
3. Kurtz S, Phillippy A, Delcher AL, Smoot M, Shumway M et al. (2004) Versatile and open software for comparing large genomes. *Genome Biol* 5: R12.
4. Foulongne-Oriol M, Spataro C, Cathalot V, Monllor S, Savoie JM (2010) An expanded genetic linkage map of an intervarietal *Agaricus bisporus* var. *bisporus* x *A. bisporus* var. *burnettii* hybrid based on AFLP, SSR and CAPS markers sheds light on the recombination behaviour of the species. *Fungal Genet Biol* 47: 226-236.
5. Foulongne-Oriol M, Dufourcq R, Spataro C, Devesse C, Broly A et al. (2011) Comparative linkage mapping in the white button mushroom *Agaricus bisporus* provides foundation for breeding management. *Curr Genet* 57: 39-50.
6. Kerrigan RW, Royer JC, Baller LM, Kohli Y, Horgen PA et al. (1993) Meiotic Behavior and Linkage Relationships in the Secondarily Homothallic Fungus *Agaricus-Bisporus*. *Genetics* 133: 225-236
7. Sonnenberg AS, de Groot PW, Schaap PJ, Baars JJ, Visser J et al. (1996) Isolation of expressed sequence tags of *Agaricus bisporus* and their assignment to chromosomes. *Appl Environ Microbiol* 62: 4542-4547.
8. Altschul SF, Gish W, Miller W, Myers EW, Lipman DJ (1990) Basic local alignment search tool. *J Mol Biol* 215: 403-410.
9. Price AL, Jones NC, Pevzner PA (2005) *De novo* identification of repeat families in large genomes. To appear in Proceedings of the 13 Annual International conference on Intelligent Systems for Molecular Biology (ISMB-05). Detroit, Michigan
10. Jurka J, Kapitonov VV, Pavlicek A, Klonowski P, Kohany O et al. (2005) Repbase Update, a database of eukaryotic repetitive elements. *Cytogenet. Genome Res.* 110: 462-467.
11. Mc Carthy E and Mc Donald JF (2003) LTR\_STRUC: a novel search and identification program for LTR retrotransposons. *Bioinformatics* 19: 362-367
12. Thompson JD, Higgins DG, Gibson TJ (1994) CLUSTAL W: improving the sensitivity of progressive multiple sequence alignments through sequence weighting, position specific gap penalties and weight matrix choice. *Nucleic Acids Res* 22: 4673-4680.
13. Ma J and Bennetzen JL (2004) Rapid recent growth and divergence of rice nuclear genomes. *Proc. Natl. Acad. Sci. USA* 101: 12404-12410.
14. Smit AFA, Hubley R, Green P (1996-2010) *RepeatMasker Open-3.0*. <http://www.repeatmasker.org>
15. Lowe TM and Eddy SR (1997) tRNAscan-SE: a program for improved detection of transfer RNA genes in genomic sequence. *Nucleic Acids Res*
16. Salamov AA and Solovyev VV (2000) Ab initio gene finding in Drosophila genomic DNA. *Genome Res* 10: 516-522.
17. Isono K, McIninch JD, Borodovsky M (1994) Characteristic features of the nucleotide sequences of yeast mitochondrial ribosomal protein genes as analyzed by computer program GeneMark. *DNA Res.* 1: 263-269.
18. Birney E and Durbin R. 2000. Using GeneWise in the Drosophila annotation experiment. *Genome Res* 10, 547-548.
19. Kent WJ (2002) BLAT--the BLAST-like alignment tool. *Genome Res*
20. Nielsen H, Engelbrecht J, Brunak S, von Heijne G (1997) Identification of prokaryotic and eukaryotic signal peptides and prediction of their cleavage sites. *Protein Eng* 10:1-6.
21. Melen K, Krogh A, von Heijne G (2003) Reliability measures for membrane protein topology prediction algorithms. *J. Mol. Biol* 327:735-744.
22. Zdobnov EM and Apweiler R (2001) InterProScan--an integration platform for the signature-recognition methods in InterPro. *Bioinformatics* 17: 847-848.
23. Kanehisa M, Araki M, Goto S, Hattori M, Hirakawa M et al. (2008) KEGG for linking genomes to life and the environment. *Nucleic Acids Res* 36: D480-D484
24. Koonin EV, Fedorova ND, Jackson JD, Jacobs AR, Krylov DM et al. (2004) A comprehensive evolutionary classification of proteins encoded in complete eukaryotic genomes. *Genome Biol* 5: R7
25. Enright AJ, Van Dongen S, Ouzounis CA (2002) An efficient algorithm for large-scale detection of protein families. *Nucleic Acids Res* 30: 1575-1584.
26. De Bie, T., Cristianini N., Demuth J.P., and Hahn M.W. CAFE: a computational tool for the study of gene family evolution. *Bioinformatics*. 22:1269-1271 (2006).
27. Eddy S.R. A New Generation of Homology Search Tools Based on Probabilistic Inference. *Genome Inform.* 23:205-211 (2009).
28. Finn R.D., Mistry J., Tate J., Coghill P., Heger A., Pollington J.E., Gavin O.L., Guneseckaran P., Ceric G., Forslund K., Holm L., Sonnhammer E.L., Eddy S.R., Bateman A. The Pfam protein families database. *Nucleic Acids Research Database Issue* 38:D211-222 (2010).
29. Emanuelsson O, Nielsen H, Brunak S, von Heijne G (2000) Predicting subcellular localization of proteins based on their N-terminal amino acid sequence. *J Mol Biol* 300: 1005-1016.
30. Rawlings ND, Barrett AJ, Bateman A (2012) MEROPS: the database of proteolytic enzymes, their substrates and inhibitors. *Nucleic Acids Res* 40 : D343-D350.
31. Saier MH, Yen MR, Noto K, Tamang DG, Elkan C (2009) The Transporter Classification Database: recent advances, *Nucleic Acids Res* 37: D274-D278.
32. Huang, X. & Madan, A. CAP3: A DNA Sequence Assembling Program. *Genome Research* 9, 868-877 (1999).
33. Calvo-Bado L, Noble R, Challen M, Dobrovin-Pennington A, Elliott T (2000) Sexuality and Genetic Identity in the *Agaricus* Section *Arvenses*. *Applied and Environmental Microbiology* Vol 66, 728-734
34. Cantarel BL, Coutinho PM, Rancurel C, Bernard T, Lombard V, Henrissat B. 2009. The Carbohydrate-Active EnZymes database (CAZy): an expert resource for glycogenomics. *Nucleic Acids Res* 37, D233-D238.
35. De Caceres, M., Oliva, F., Font, X. & Vives, S. (2007) Ginkgo, a program for non-standard multivariate fuzzy analysis. *Advances in Fuzzy Sets and Systems* 2 (1): 41-56.
36. Desper R., Gascuel O. (2002) Fast and accurate phylogeny reconstruction algorithms based on the minimum-evolution principle. *Journal of Computational Biology*. 9(5):687-705.
37. Floudas D, Binder M, Riley R, Barry K, Blanchette RA et al. (2012) The Paleozoic origin of enzymatic lignin decomposition reconstructed from 31 fungal genomes. *Science* 336 (6089):1715-9
38. Sun S, Xu J (2009) Chromosomal rearrangements between serotype A and D strains in *Cryptococcus neoformans*. *PLoS ONE* 4: e5524.
39. Royer, D. J., W. E. A. Hintz, R. W. Kerrigan, and P. A. Horgen. 1992. Electrophoretic karyotype analysis of the button mushroom, *Agaricus bisporus*. *Genome*. 35: 694-698.

40. Murata, Y, Fujii, M, Zolan, ME, Kamada, T (1998). Molecular analysis of *pcc1*, a gene that leads to A-regulated sexual morphogenesis in *Coprinus cinereus*. *Genetics*, 149: 1753–1761.
41. Muraguchi H, Fujita T, Kishibe Y, Konno K, Ueda N, Nakahori K, Yanagi SO, Kamada T (2008) The *exp1* gene essential for pileus expansion and autolysis of the inky cap mushroom *Coprinopsis cinerea* (*Coprinus cinereus*) encodes an HMG protein. *Fung Genet Biol* 45:890–896

## Supplementary Tables

**Table S1.** Final assembly statistics for *Agaricus bisporus* genomes

| Sequenced strain                    | <i>A. bisporus</i> var. <i>bisporus</i> | <i>A. bisporus</i> var. <i>burnettii</i> |
|-------------------------------------|-----------------------------------------|------------------------------------------|
| Assembler (Sequencing strategy)     | Arachne (Sanger)                        | Newbler (454)+Velvet (Illumina)          |
| Main genome scaffold total          | 29                                      | 2016                                     |
| Main genome contig total            | 254                                     | 2527                                     |
| Main genome scaffold sequence total | 30.2 Mb                                 | 32.6 Mb                                  |
| Main genome contig sequence total   | 30.0 Mb                                 | 31.2 Mb                                  |
| Main genome scaffold N/L50          | 6/2.3 Mb                                | 8/1.23 Mb                                |
| Main genome contig N/L50            | 35/262.5 Kb                             | 39/0.163 Kb                              |
| Number of scaffolds > 50 Kb         | 19                                      | 52                                       |
| % main genome in scaffolds > 50 Kb  | 99.7%                                   | 87.9%                                    |

**Table S2.** Characteristics of predicted gene models.

| Sequenced strain        | <i>A. bisporus</i> var. <i>bisporus</i> | <i>A. bisporus</i> var. <i>burnettii</i> |
|-------------------------|-----------------------------------------|------------------------------------------|
| Avg. gene length, bp    | 1764                                    | 1669                                     |
| Avg. protein length, aa | 426                                     | 410                                      |
| Avg. exon frequency     | 6.05 exons/gene                         | 5.72 exons/gene                          |
| Avg. exon length, bp    | 234                                     | 236                                      |
| Avg. intron length, bp  | 71                                      | 69                                       |

**Table S3.** Predicted gene models and supporting lines of evidence

| Sequenced strain                              | <i>A. bisporus</i> var. <i>bisporus</i> | <i>A. bisporus</i> var. <i>burnettii</i> |
|-----------------------------------------------|-----------------------------------------|------------------------------------------|
| # gene models                                 | 10,438                                  | 11,289                                   |
| % complete (with start and stop codons)       | 90%                                     | 87%                                      |
| % genes with homology support                 | 83%                                     | 79%                                      |
| % genes with PFAM domains                     | 52%                                     | 62%                                      |
| Models with exons covered by ESTs $\geq 75\%$ | 69%                                     | 61%                                      |

**Table S4.** Number of orthologs (% amino acid identity) between *Agaricus bisporus* strains and other Agaricomycetes

|                                     | <i>A. bisporus</i> var. <i>bisporus</i> | <i>A. bisporus</i> var. <i>burnettii</i> |
|-------------------------------------|-----------------------------------------|------------------------------------------|
| <i>Agaricus bisporus</i> (non-self) | 8649 (96.4%)                            | 8649 (96.4%)                             |
| <i>Coprinopsis cinerea</i>          | 6059 (57%)                              | 6074 (57%)                               |
| <i>Laccaria bicolor</i>             | 5927 (60%)                              | 5942 (60%)                               |
| <i>Phanerochaete chrysosporium</i>  | 5139 (58%)                              | 5134 (58%)                               |
| <i>Postia placenta</i>              | 5090 (58%)                              | 5062 (58%)                               |

**Table S5.** The top 10 most abundant (MCL) protein families (excluding TE-related families) in *A. bisporus* var. *bisporus* genome as compared to other fungi.

| Family ID | PFAM description              | AGABI     | COPCI | LACBI | SCHCO | PLEOS | SERLA | HETAN | POSPL | PHACH | CRYNE | TREME | MELLA | SPORO | USTMA | MALGO | Total |
|-----------|-------------------------------|-----------|-------|-------|-------|-------|-------|-------|-------|-------|-------|-------|-------|-------|-------|-------|-------|
| 2         | Cytochrome P450               | <b>64</b> | 69    | 26    | 49    | 86    | 72    | 87    | 119   | 61    | 0     | 0     | 4     | 0     | 4     | 1     | 642   |
| 1         | Protein kinase domain         | <b>39</b> | 37    | 46    | 44    | 47    | 38    | 39    | 43    | 42    | 30    | 33    | 62    | 34    | 29    | 29    | 592   |
| 11        | GMC oxidoreductase            | <b>32</b> | 35    | 11    | 19    | 42    | 9     | 31    | 26    | 32    | 3     | 2     | 6     | 5     | 9     | 5     | 267   |
| 3         | WD domain, G-beta repeat      | <b>31</b> | 36    | 76    | 35    | 41    | 43    | 45    | 38    | 31    | 22    | 20    | 22    | 21    | 19    | 21    | 501   |
| 43        | Fungal hydrophobin            | <b>28</b> | 31    | 16    | 11    | 21    | 17    | 16    | 1     | 12    | 0     | 0     | 0     | 0     | 2     | 0     | 155   |
| 4         | Major Facilitator Superfamily | <b>25</b> | 33    | 13    | 40    | 37    | 19    | 33    | 26    | 28    | 39    | 16    | 22    | 18    | 16    | 2     | 367   |
| 5         | DEAD/DEAH box helicase        | <b>25</b> | 24    | 27    | 28    | 25    | 25    | 25    | 24    | 23    | 25    | 24    | 25    | 26    | 26    | 24    | 376   |
| 8         | Ras family                    | <b>23</b> | 19    | 27    | 20    | 19    | 16    | 18    | 21    | 20    | 15    | 18    | 27    | 18    | 18    | 11    | 290   |
| 39        | GTPase of unknown function    | <b>23</b> | 29    | 47    | 0     | 29    | 0     | 0     | 15    | 10    | 0     | 0     | 0     | 0     | 0     | 0     | 153   |
| 15        | Cytochrome P450               | <b>22</b> | 14    | 26    | 27    | 27    | 26    | 30    | 51    | 17    | 2     | 3     | 5     | 1     | 5     | 2     | 258   |

Abbreviations: AGABI, *A. bisporus*; COPCI, *C. cinerea*; LACBI, *Laccaria bicolor*; SCHCO, *S. commune*; PLEOS, *P. ostreatus*; SERLA, *S. lacrymans*; HETAN, *H. annosum*; POSPL, *P. postia*; PHACH, *P. chrysosporium*; CRYNE, *C. neoformans*; TREME, *T. mesenterica*; MELLA, *M. larici-populina*; SPORO, *S. roseus*; USTMA, *U. maydis* and MALGO, *M. globosa*.

**Table S6.** The top 15 protein families in contraction in *A. bisporus* var. *bisporus* genome as compared to other fungi. The table lists 15 MCL families with the lower size in the *A. bisporus* lineage (CAFE analysis,  $P < 0.001$ ). Annotations are based on searches of *A. bisporus* protein sequences against the PFAM database.

| Family ID | PFAM description                                 | Nr description             | AGABI    | COPCI | LACBI | SCHCO | PLEOS | SERLA | HETAN | POSPL | PHACH | CRYNE | TREME | MELLA | SPORO | USTMA | MALGO | Total | p-value  |
|-----------|--------------------------------------------------|----------------------------|----------|-------|-------|-------|-------|-------|-------|-------|-------|-------|-------|-------|-------|-------|-------|-------|----------|
| 54        | NO PFAM                                          | Hypothetical protein       | <b>4</b> | 13    | 53    | 19    | 45    | 1     | 5     | 1     | 2     | 0     | 0     | 0     | 0     | 0     | 0     | 143   | 0.000000 |
| 72        | NO PFAM                                          | Hypothetical protein       | <b>0</b> | 46    | 53    | 5     | 6     | 12    | 0     | 0     | 0     | 0     | 0     | 0     | 0     | 0     | 0     | 122   | 0.000000 |
| 40        | NO PFAM                                          | Hypothetical protein       | <b>7</b> | 23    | 27    | 40    | 5     | 6     | 9     | 12    | 30    | 0     | 0     | 0     | 0     | 0     | 0     | 159   | 0.000010 |
| 117       | Protein kinase domain                            | other/AgaK1 protein kinase | <b>0</b> | 5     | 15    | 10    | 4     | 23    | 2     | 29    | 6     | 0     | 0     | 0     | 0     | 0     | 0     | 94    | 0.000012 |
| 42        | NO PFAM                                          | Hypothetical protein       | <b>5</b> | 12    | 18    | 16    | 21    | 37    | 35    | 10    | 2     | 2     | 0     | 0     | 0     | 0     | 0     | 158   | 0.000042 |
| 213       | F-box protein                                    | Hypothetical protein       | <b>1</b> | 12    | 4     | 34    | 3     | 2     | 3     | 3     | 3     | 0     | 0     | 0     | 0     | 0     | 0     | 65    | 0.000294 |
| 166       | NADH:flavin oxidoreductase / NADH oxidase family | NADPH dehydrogenase        | <b>0</b> | 2     | 6     | 17    | 9     | 5     | 9     | 15    | 2     | 3     | 1     | 0     | 1     | 0     | 0     | 70    | 0.000406 |
| 432       | NO PFAM                                          | Hypothetical protein       | <b>0</b> | 3     | 19    | 8     | 1     | 5     | 4     | 0     | 4     | 0     | 0     | 0     | 0     | 0     | 0     | 44    | 0.000406 |
| 597       | NO PFAM                                          | Hypothetical protein       | <b>0</b> | 2     | 11    | 11    | 1     | 11    | 0     | 1     | 0     | 0     | 0     | 0     | 0     | 0     | 0     | 37    | 0.000406 |
| 139       | NO PFAM                                          | Hypothetical protein       | <b>2</b> | 1     | 34    | 11    | 7     | 9     | 3     | 6     | 13    | 0     | 0     | 0     | 1     | 0     | 0     | 87    | 0.000627 |
| 56        | tetratricopeptide repeat                         | Hypothetical protein       | <b>5</b> | 41    | 35    | 1     | 4     | 10    | 30    | 1     | 5     | 1     | 1     | 0     | 1     | 1     | 1     | 137   | 0.000898 |
| 122       | F-box protein                                    | Hypothetical protein       | <b>1</b> | 29    | 10    | 1     | 5     | 1     | 28    | 4     | 13    | 0     | 0     | 0     | 0     | 0     | 0     | 92    | 0.001161 |
| 61        | Short-chain dehydrogenase                        | Retinol dehydrogenase      | <b>3</b> | 9     | 11    | 11    | 10    | 15    | 6     | 18    | 6     | 2     | 4     | 5     | 3     | 2     | 2     | 107   | 0.001173 |
| 103       | NO PFAM                                          | Predicted protein          | <b>0</b> | 1     | 67    | 0     | 36    | 0     | 0     | 0     | 0     | 0     | 0     | 0     | 0     | 0     | 0     | 104   | 0.004124 |
| 198       | NO PFAM                                          | Predicted protein          | <b>0</b> | 4     | 55    | 7     | 0     | 1     | 0     | 0     | 0     | 0     | 0     | 0     | 0     | 0     | 0     | 67    | 0.004124 |

Abbreviations: AGABI, *A. bisporus*; COPCI, *C. cinerea*; LACBI, *Laccaria bicolor*; SCHCO, *S. commune*; PLEOS, *P. ostreatus*; SERLA, *S. lacrymans*; HETAN, *H. annosum*; POSPL, *P. postia*; PHACH, *P. chrysosporium*; CRYNE, *C. neoformans*; TREME, *T. mesenterica*; MELLA, *M. larici-populina*; SPORO, *S. roseus*; USTMA, *U. maydis* and MALGO, *M. globosa*.

**Table S7.** The top 15 protein families in expansion in *A. bisporus* var. *bisporus* genome as compared to other fungi. The table lists MCL families that are in expansion in the *A. bisporus* lineage (CAFE analysis,  $P < 0.001$ ). Annotations are based on searches of *A. bisporus* protein sequences against the PFAM database.

| Family ID | PFAM description              | Nr description                            | AGABI      | COPCI | LACBI | SCHCO | PLEOS | SERLA | HETAN | POSPL | PHACH | CRYNE | TREME | MELLA | SPORO | USTMA | MALGO | Total | p-value  |
|-----------|-------------------------------|-------------------------------------------|------------|-------|-------|-------|-------|-------|-------|-------|-------|-------|-------|-------|-------|-------|-------|-------|----------|
| 26        | NO PFAM                       | NWD2 protein                              | <b>169</b> | 23    | 3     | 0     | 7     | 0     | 1     | 3     | 1     | 0     | 0     | 0     | 0     | 0     | 0     | 207   | 0.000000 |
| 32        | NO PFAM                       | Hypothetical protein                      | <b>20</b>  | 3     | 0     | 0     | 3     | 149   | 3     | 0     | 4     | 0     | 0     | 0     | 0     | 0     | 0     | 182   | 0.000000 |
| 402       | Patatin                       | Kinesin light chain                       | <b>18</b>  | 1     | 3     | 7     | 2     | 0     | 0     | 0     | 0     | 0     | 0     | 1     | 0     | 0     | 0     | 32    | 0.000000 |
| 546       | NO PFAM                       | Predicted protein                         | <b>38</b>  | 0     | 0     | 0     | 0     | 1     | 0     | 0     | 0     | 0     | 0     | 0     | 0     | 0     | 0     | 39    | 0.000000 |
| 688       | Peroxidase, family 2          | Aromatic peroxygenase                     | <b>26</b>  | 5     | 1     | 0     | 0     | 0     | 0     | 0     | 0     | 0     | 0     | 0     | 0     | 0     | 0     | 32    | 0.000000 |
| 783       | NO PFAM                       | Hypothetical protein                      | <b>29</b>  | 1     | 0     | 0     | 0     | 1     | 0     | 0     | 0     | 0     | 0     | 0     | 0     | 0     | 0     | 31    | 0.000000 |
| 964       | NO PFAM                       | Hypothetical protein                      | <b>17</b>  | 4     | 1     | 1     | 0     | 0     | 0     | 4     | 0     | 0     | 0     | 0     | 0     | 0     | 0     | 27    | 0.000000 |
| 458       | NO PFAM                       | Hypothetical protein                      | <b>10</b>  | 1     | 2     | 1     | 4     | 20    | 1     | 2     | 2     | 0     | 0     | 0     | 0     | 0     | 0     | 43    | 0.000010 |
| 668       | NO PFAM                       | MutS protein homolog                      | <b>9</b>   | 5     | 1     | 0     | 1     | 5     | 0     | 9     | 4     | 0     | 0     | 0     | 0     | 0     | 0     | 34    | 0.000057 |
| 27        | Aldehyde dehydrogenase family | Methylmalonate-semialdehyde dehydrogenase | <b>21</b>  | 9     | 11    | 10    | 12    | 11    | 10    | 14    | 14    | 11    | 7     | 8     | 9     | 14    | 4     | 165   | 0.000126 |
| 226       | NO PFAM                       | Hypothetical protein                      | <b>11</b>  | 5     | 5     | 9     | 6     | 3     | 4     | 3     | 15    | 0     | 0     | 0     | 0     | 1     | 1     | 63    | 0.002189 |
| 43        | Hydrophobin                   | Hydrophobin                               | <b>28</b>  | 31    | 16    | 11    | 21    | 17    | 16    | 1     | 12    | 0     | 0     | 0     | 0     | 2     | 0     | 155   | 0.010667 |
| 770       | 3'-5' exonuclease             | Putative exonuclease                      | <b>10</b>  | 0     | 20    | 0     | 1     | 0     | 0     | 0     | 0     | 0     | 0     | 0     | 0     | 0     | 0     | 31    | 0.010830 |
| 118       | Glutathione S-transferase     | Putative Beta-etherase                    | <b>16</b>  | 13    | 3     | 9     | 7     | 22    | 8     | 9     | 5     | 0     | 0     | 0     | 0     | 0     | 0     | 92    | 0.014126 |
| 11        | GMC oxidoreductase family     | Pyranose dehydrogenase                    | <b>32</b>  | 35    | 11    | 19    | 42    | 9     | 31    | 26    | 32    | 3     | 2     | 6     | 5     | 9     | 5     | 267   | 0.018344 |

Abbreviations: AGABI, *A. bisporus*; COPCI, *C. cinerea*; LACBI, *Laccaria bicolor*; SCHCO, *S. commune*; PLEOS, *P. ostreatus*; SERLA, *S. lacrymans*; HETAN, *H. annosum*; POSPL, *P. postia*; PHACH, *P. chrysosporium*; CRYNE, *C. neoformans*; TREME, *T. mesenterica*; MELLA, *M. larici-populina*; SPORO, *S. roseus*; USTMA, *U. maydis* and MALGO, *M. globosa*.

**Table S8.** The 45 most highly up-regulated transcripts of *A. bisporus* var. *bisporus* growing on compost by comparison to defined agar culture medium. Up-regulation ratios are also showed for casing and fruit body. Non-significant ratios (p-value FDR, modified t test >0.05) are marked in grey.

| Protein ID | ratio<br>Compost/Culture | ratio<br>Casing/Culture | ratio Fruit Body/Culture | Description                                               |
|------------|--------------------------|-------------------------|--------------------------|-----------------------------------------------------------|
| 193563     | 1492.1                   | 299.6                   | 15.8                     | Chloroperoxidase                                          |
| 190202     | 1439.7                   | 5.5                     | 0.2                      | Cutinase                                                  |
| 194280     | 1382.0                   | 14.6                    | 5.3                      | Glycoside hydrolase, family 12                            |
| 227728     | 1335.5                   | 0.9                     | 1.4                      | Glycoside hydrolase, family 12                            |
| 190200     | 1235.9                   | 0.6                     | 0.8                      | Cutinase                                                  |
| 194662     | 864.3                    | 5.5                     | 1.2                      | Hypothetical protein                                      |
| 146117     | 820.9                    | 7.2                     | 2.2                      | Glycosyl hydrolase, family 88                             |
| 190390     | 672.0                    | 2.1                     | 3.5                      | Glycoside hydrolase, family 6 1, 4-beta cellobiohydrolase |
| 196181     | 664.7                    | 0.7                     | 1.8                      | Glycoside hydrolase, family 11                            |
| 226235     | 641.2                    | 2.6                     | 1.8                      | Glycoside hydrolase, family 61                            |
| 183005     | 616.9                    | 0.7                     | 0.3                      | Cutinase                                                  |
| 122979     | 578.8                    | 27.0                    | 0.4                      | Hypothetical protein                                      |
| 195916     | 536.7                    | 7.9                     | 0.6                      | Glucanase                                                 |
| 183646     | 523.6                    | 0.8                     | 1.2                      | Glucose-methanol-choline oxidoreductase                   |
| 195861     | 489.2                    | 1.6                     | 0.4                      | Sugar transporter                                         |
| 194696     | 482.5                    | 8.9                     | 2.9                      | Glycoside hydrolase, family 61                            |
| 194576     | 461.7                    | 1.3                     | 1.1                      | Alpha-L-arabinofuranosidase                               |
| 188060     | 270.0                    | 2.9                     | 1.9                      | Glycoside hydrolase, family 20                            |
| 192849     | 263.2                    | 1.4                     | 1.4                      | Glycoside hydrolase                                       |
| 211295     | 239.1                    | 6.9                     | 0.1                      | Glycoside hydrolase family 13                             |
| 72717      | 235.5                    | 2.3                     | 1.5                      | Rhamnogalacturonase B                                     |
| 192976     | 223.2                    | 7.8                     | 4.3                      | Hypothetical protein                                      |
| 122757     | 204.8                    | 1.1                     | 0.8                      | Glycoside hydrolase, family 61                            |
| 123457     | 188.3                    | 14.2                    | 0.4                      | Hypothetical protein                                      |
| 194618     | 178.9                    | 1.5                     | 2.8                      | Glucanase                                                 |
| 133541     | 178.7                    | 1.5                     | 1.6                      | Glycoside hydrolase, family 10                            |
| 212650     | 158.4                    | 0.4                     | 0.7                      | Peptidase S8, subtilisin                                  |
| 70106      | 142.8                    | 8.1                     | 10.2                     | Glycoside hydrolase, family 27                            |
| 68978      | 140.5                    | 1.8                     | 1.1                      | Peptidase S10, serine carboxypeptidase                    |
| 180108     | 137.1                    | 2.6                     | 4.8                      | Beta-lactamase                                            |
| 77253      | 136.2                    | 4693.2                  | 8588.5                   | Fungal hydrophobin                                        |
| 79647      | 134.0                    | 2.1                     | 1.2                      | Glycoside hydrolase, family 11                            |
| 194521     | 127.9                    | 2.2                     | 1.2                      | Glycoside hydrolase, family 7                             |
| 180408     | 122.1                    | 2.3                     | 1.4                      | Protein DUF1680                                           |
| 209748     | 122.1                    | 2.3                     | 2.0                      | Cellulose-binding region                                  |
| 181624     | 121.4                    | 71.9                    | 31.8                     | Hypothetical protein                                      |
| 139877     | 118.7                    | 1.8                     | 2.3                      | Pectate lyase                                             |
| 149407     | 114.1                    | 1.2                     | 0.3                      | Hypothetical protein                                      |
| 194321     | 113.5                    | 1.5                     | 4.1                      | Cutinase                                                  |
| 175634     | 110.7                    | 1.5                     | 0.8                      | Hypothetical protein                                      |
| 207786     | 109.3                    | 0.9                     | 1.8                      | Chloroperoxidase                                          |
| 139148     | 108.1                    | 1.7                     | 0.8                      | Multicopper oxidase Cupredoxin                            |
| 194744     | 106.0                    | 1.1                     | 6.3                      | Glycoside hydrolase, family 1                             |
| 139552     | 105.1                    | 43.1                    | 2.5                      | Alcohol dehydrogenase                                     |
| 194648     | 104.6                    | 1.9                     | 0.1                      | Peptidase S8, subtilisin                                  |



**Table S9.** Up-regulation of transcripts coding for carbohydrate-active enzymes (CAZymes) potentially involved in degradation of polysaccharides in *A. bisporus* var. *bisporus* mycelium grown on agar medium (Culture), casing layer (Casing), compost or in fruiting body. Genes showing an up-regulation >30-fold on compost are presented. Non-significant ratios (p-value FDR, modified t test >0.05) are marked in grey.

| CAZy module(s) | Protein_ID | Culture | Casing | Compost | Fruit Body | ratio<br>Casing/Culture | P value | ratio<br>Compost/Culture | P value | ratio<br>Fruit body/Culture | P value |
|----------------|------------|---------|--------|---------|------------|-------------------------|---------|--------------------------|---------|-----------------------------|---------|
| CE5            | 190202     | 44      | 241    | 63346   | 9          | 5.48                    | 0.2420  | 1447.25                  | 0.0002  | 0.20                        | 0.0119  |
| GH12           | 194280     | 14      | 204    | 19348   | 74         | 14.57                   | 0.0019  | 1370.85                  | 0.0013  | 5.21                        | 0.0199  |
| GH12           | 227728     | 35      | 30     | 46743   | 50         | 0.86                    | 0.5800  | 1343.04                  | 0.0001  | 1.44                        | 0.2170  |
| CE5            | 190200     | 8       | 5      | 9887    | 6          | 0.63                    | 0.1550  | 1277.22                  | 0.0025  | 0.81                        | 0.5500  |
| GH105          | 146117     | 18      | 129    | 14776   | 39         | 7.17                    | 0.0026  | 836.16                   | 0.0001  | 2.22                        | 0.0892  |
| CBM1-GH6       | 190390     | 51      | 109    | 34273   | 176        | 2.14                    | 0.0133  | 672.22                   | 0.0002  | 3.46                        | 0.0006  |
| GH11           | 196181     | 84      | 58     | 55831   | 151        | 0.69                    | 0.2860  | 668.23                   | 0.0010  | 1.80                        | 0.0177  |
| GH61-CBM1      | 226235     | 5       | 13     | 3206    | 9          | 2.60                    | 0.0482  | 631.88                   | 0.0257  | 1.82                        | 0.0267  |
| CE5            | 183005     | 126     | 93     | 77730   | 35         | 0.74                    | 0.6760  | 617.99                   | 0.0006  | 0.28                        | 0.1300  |
| GH16           | 195916     | 175     | 1386   | 93918   | 113        | 7.92                    | 0.1220  | 536.28                   | 0.0003  | 0.64                        | 0.2040  |
| GH61           | 194696     | 28      | 248    | 13510   | 81         | 8.86                    | 0.0009  | 482.33                   | 0.0270  | 2.88                        | 0.0064  |
| GH51           | 194576     | 61      | 77     | 28165   | 70         | 1.26                    | 0.6020  | 464.34                   | 0.0002  | 1.15                        | 0.5870  |
| GH20           | 188060     | 8       | 23     | 2160    | 15         | 2.88                    | 0.0062  | 276.83                   | 0.0005  | 1.98                        | 0.0125  |
| GH5            | 192849     | 131     | 188    | 34480   | 179        | 1.44                    | 0.0289  | 262.61                   | 0.0002  | 1.37                        | 0.0286  |
| GH13           | 211295     | 91      | 630    | 21755   | 11         | 6.92                    | 0.1210  | 238.07                   | 0.0002  | 0.12                        | 0.0023  |
| PL4            | 72717      | 169     | 388    | 39793   | 251        | 2.30                    | 0.0181  | 235.71                   | 0.0002  | 1.49                        | 0.0734  |
| GH61           | 122757     | 45      | 51     | 9215    | 35         | 1.13                    | 0.6320  | 202.84                   | 0.0273  | 0.76                        | 0.3690  |
| GH16           | 194618     | 246     | 358    | 44006   | 698        | 1.46                    | 0.1010  | 178.85                   | 0.0003  | 2.84                        | 0.0030  |
| CBM1-GH10      | 133541     | 490     | 751    | 87557   | 782        | 1.53                    | 0.0245  | 178.74                   | 0.0004  | 1.60                        | 0.0442  |
| GH27           | 70106      | 419     | 3396   | 59817   | 4281       | 8.11                    | 0.0000  | 142.61                   | 0.0001  | 10.21                       | 0.0766  |
| GH11-CBM1-UNK  | 79647      | 140     | 290    | 18762   | 170        | 2.07                    | 0.0295  | 133.98                   | 0.0570  | 1.21                        | 0.0742  |
| GH7-CBM1       | 194521     | 1681    | 3694   | 214989  | 1981       | 2.20                    | 0.0026  | 127.90                   | 0.0006  | 1.18                        | 0.1930  |
| CBM1-CE15      | 209748     | 121     | 280    | 14774   | 244        | 2.31                    | 0.0009  | 122.10                   | 0.0004  | 2.01                        | 0.0058  |
| PL1            | 139877     | 995     | 1835   | 118069  | 2323       | 1.84                    | 0.0206  | 118.69                   | 0.0003  | 2.34                        | 0.0252  |
| CE5            | 194321     | 127     | 194    | 14419   | 516        | 1.53                    | 0.0529  | 113.85                   | 0.0002  | 4.07                        | 0.0001  |
| GH1            | 194744     | 98      | 108    | 10389   | 613        | 1.10                    | 0.7230  | 106.39                   | 0.0005  | 6.28                        | 0.0010  |
| CBM1-GH5       | 191420     | 267     | 365    | 25908   | 476        | 1.37                    | 0.1030  | 96.93                    | 0.0002  | 1.78                        | 0.0036  |
| GH78           | 210102     | 194     | 387    | 17845   | 275        | 1.99                    | 0.0233  | 92.04                    | 0.0002  | 1.42                        | 0.0276  |
| GH28           | 194940     | 151     | 1032   | 13906   | 150        | 6.83                    | 0.0022  | 92.01                    | 0.0003  | 0.99                        | 0.9720  |

|           |        |      |      |       |      |      |        |       |        |        |        |
|-----------|--------|------|------|-------|------|------|--------|-------|--------|--------|--------|
| CE16      | 179406 | 127  | 147  | 10087 | 96   | 1.16 | 0.6270 | 79.68 | 0.0012 | 0.76   | 0.1210 |
| GH3       | 219902 | 383  | 1395 | 29848 | 1869 | 3.64 | 0.0119 | 77.91 | 0.0005 | 4.88   | 0.0005 |
| GH61      | 137828 | 109  | 60   | 8494  | 442  | 0.55 | 0.0455 | 77.58 | 0.0671 | 4.03   | 0.0044 |
| CE8       | 151878 | 16   | 103  | 1210  | 77   | 6.44 | 0.0004 | 76.86 | 0.0004 | 4.87   | 0.0008 |
| GH43      | 224152 | 613  | 763  | 46615 | 1031 | 1.24 | 0.0662 | 76.06 | 0.0001 | 1.68   | 0.0314 |
| CE1-CBM1  | 196213 | 250  | 353  | 17166 | 843  | 1.41 | 0.1430 | 68.79 | 0.0010 | 3.38   | 0.0629 |
| CBM1      | 194858 | 30   | 58   | 2089  | 107  | 1.93 | 0.0821 | 68.77 | 0.0324 | 3.51   | 0.0086 |
| CBM1-GH5  | 189329 | 366  | 357  | 22438 | 413  | 0.98 | 0.7650 | 61.26 | 0.0024 | 1.13   | 0.1320 |
| GH43      | 208425 | 217  | 1520 | 13105 | 300  | 7.00 | 0.0276 | 60.40 | 0.0002 | 1.39   | 0.1330 |
| GH55      | 183321 | 1384 | 5850 | 83158 | 1575 | 4.23 | 0.0521 | 60.08 | 0.0004 | 1.14   | 0.3820 |
| CBM1-GH5  | 194478 | 270  | 354  | 15454 | 390  | 1.31 | 0.1950 | 57.33 | 0.0021 | 1.45   | 0.0499 |
| PL3       | 195581 | 1027 | 1155 | 57520 | 1355 | 1.12 | 0.5250 | 56.02 | 0.0004 | 1.32   | 0.2590 |
| GH10      | 191440 | 363  | 1029 | 18571 | 545  | 2.83 | 0.0198 | 51.20 | 0.0004 | 1.50   | 0.0527 |
| GH74-CBM1 | 214617 | 375  | 620  | 18092 | 506  | 1.65 | 0.0849 | 48.30 | 0.0011 | 1.35   | 0.0496 |
| GH5       | 229390 | 1124 | 4694 | 50706 | 971  | 4.18 | 0.0001 | 45.13 | 0.0002 | 0.86   | 0.3630 |
| GH61      | 136180 | 28   | 64   | 1222  | 6238 | 2.29 | 0.1840 | 43.42 | 0.0282 | 221.63 | 0.0000 |
| GH25      | 120008 | 23   | 5    | 963   | 9    | 0.22 | 0.0140 | 41.71 | 0.0092 | 0.40   | 0.1380 |
| GH29      | 209111 | 1087 | 2385 | 43080 | 836  | 2.19 | 0.0013 | 39.62 | 0.0001 | 0.77   | 0.0338 |
| CBM1-GH5  | 192609 | 678  | 583  | 26379 | 440  | 0.86 | 0.1180 | 38.89 | 0.0011 | 0.65   | 0.0253 |
| CBM1-CE16 | 192194 | 232  | 231  | 8912  | 714  | 1.00 | 0.9760 | 38.35 | 0.0072 | 3.07   | 0.0001 |
| GH61-CBM1 | 192993 | 147  | 579  | 5547  | 109  | 3.94 | 0.0002 | 37.63 | 0.0261 | 0.74   | 0.1940 |
| GH2       | 202715 | 86   | 233  | 3037  | 371  | 2.71 | 0.0012 | 35.17 | 0.0001 | 4.30   | 0.0002 |
| GH115     | 121649 | 378  | 516  | 12627 | 904  | 1.37 | 0.4990 | 33.43 | 0.0004 | 2.39   | 0.0022 |
| GH2       | 188899 | 312  | 1121 | 10087 | 435  | 3.59 | 0.0252 | 32.35 | 0.0001 | 1.40   | 0.2890 |
| CE5-CBM1  | 136707 | 262  | 297  | 8054  | 534  | 1.13 | 0.7390 | 30.74 | 0.0092 | 2.04   | 0.0026 |

**Table S10.** Gene contents in wood decay proteins in the genomes of 20 Agaricomycotina. (11 oxidoreductase and 17 CAZyme families)

| Taxonomy | Agaricomycotina |                 |     |     |     |     |     |     |     |     |     |     |     |     |     |     |     |     |     |     |     |
|----------|-----------------|-----------------|-----|-----|-----|-----|-----|-----|-----|-----|-----|-----|-----|-----|-----|-----|-----|-----|-----|-----|-----|
|          | Agaricomycetes  |                 |     |     |     |     |     |     |     |     |     |     |     |     |     |     |     |     |     | Dac |     |
|          | Ab              | Abb             | Ha  | Sh  | Ps  | Fm  | Ad  | Tv  | Ds  | Pc  | Pp  | Wc  | Fp  | Gt  | Sl  | Cp  | Lb  | Sc  | Cc  | Da  |     |
| Ecology  | S               |                 | WR  |     |     |     |     |     |     | BR  |     |     |     |     | ECM | WR  | S   | BR  |     |     |     |
|          |                 | CAZymes         |     |     |     |     |     |     |     |     |     |     |     |     |     |     |     |     |     |     |     |
| Genes    | P               |                 |     |     |     |     |     |     |     |     |     |     |     |     |     |     |     |     |     |     |     |
| GH3      | 0.000           | 8               | 8   | 11  | 15  | 12  | 7   | 12  | 11  | 7   | 9   | 5   | 7   | 12  | 9   | 9   | 12  | 2   | 11  | 7   | 8   |
| GH5      | 0.003           | 19              | 19  | 7   | 6   | 6   | 6   | 8   | 5   | 5   | 5   | 4   | 5   | 5   | 8   | 8   | 3   | 3   | 6   | 5   |     |
| GH6      | 0.207           | 1               | 1   | 1   | 1   | 1   | 2   | 2   | 1   | 1   | 0   | 0   | 0   | 0   | 1   | 2   | 0   | 1   | 5   | 0   |     |
| GH7      | 0.000           | 1               | 1   | 1   | 3   | 5   | 2   | 6   | 4   | 4   | 8   | 0   | 0   | 0   | 0   | 2   | 0   | 2   | 6   | 0   |     |
| GH10     | 0.000           | 2               | 2   | 2   | 6   | 5   | 4   | 6   | 6   | 5   | 6   | 4   | 4   | 2   | 3   | 1   | 3   | 0   | 5   | 6   | 3   |
| GH11     | 0.043           | 2               | 2   | 0   | 1   | 1   | 0   | 3   | 0   | 0   | 1   | 0   | 0   | 0   | 0   | 0   | 0   | 1   | 6   | 0   |     |
| GH12     | 0.236           | 2               | 2   | 4   | 5   | 2   | 3   | 1   | 5   | 3   | 2   | 2   | 2   | 2   | 1   | 4   | 3   | 1   | 1   | 1   |     |
| GH28     | 0.000           | 6               | 6   | 8   | 17  | 13  | 16  | 10  | 11  | 7   | 4   | 7   | 9   | 13  | 10  | 7   | 13  | 7   | 3   | 3   | 6   |
| GH61     | 0.000           | 11              | 11  | 10  | 16  | 14  | 13  | 19  | 18  | 15  | 15  | 2   | 2   | 4   | 4   | 5   | 10  | 5   | 22  | 35  | 0   |
| GH74     | 0.539           | 1               | 1   | 1   | 2   | 2   | 4   | 1   | 1   | 1   | 4   | 0   | 0   | 0   | 1   | 1   | 0   | 0   | 1   | 1   | 0   |
| GH43     | 0.000           | 4               | 4   | 4   | 10  | 7   | 6   | 26  | 3   | 7   | 4   | 1   | 1   | 7   | 5   | 1   | 6   | 0   | 12  | 4   | 5   |
| CE1      | 0.015           | 2               | 2   | 1   | 1   | 2   | 0   | 3   | 3   | 0   | 4   | 0   | 0   | 0   | 1   | 0   | 0   | 0   | 4   | 3   | 0   |
| CE16     | 0.000           | 10              | 10  | 5   | 10  | 8   | 6   | 29  | 7   | 10  | 2   | 5   | 6   | 11  | 6   | 3   | 6   | 3   | 10  | 5   | 4   |
| CE5      | 0.035           | 6               | 6   | 0   | 1   | 1   | 0   | 3   | 0   | 0   | 0   | 0   | 0   | 0   | 0   | 1   | 1   | 2   | 6   | 0   |     |
| CE8      | 0.084           | 2               | 2   | 3   | 4   | 6   | 3   | 3   | 2   | 3   | 2   | 1   | 1   | 2   | 2   | 2   | 4   | 2   | 0   | 3   |     |
| CE12     | 0.273           | 3               | 2   | 2   | 3   | 0   | 2   | 1   | 0   | 2   | 0   | 0   | 0   | 0   | 0   | 0   | 0   | 1   | 1   | 1   | 0   |
| CE15     | 0.011           | 0               | 0   | 1   | 1   | 2   | 1   | 6   | 2   | 2   | 2   | 1   | 1   | 1   | 0   | 0   | 0   | 2   | 8   | 1   |     |
|          |                 | Oxidoreductases |     |     |     |     |     |     |     |     |     |     |     |     |     |     |     |     |     |     |     |
| POD      | 0.000           | 2               | 2   | 8   | 6   | 11  | 17  | 19  | 26  | 12  | 16  | 1   | 1   | 1   | 0   | 0   | 1   | 0   | 1   | 0   |     |
| MCO      | 0.000           | 12              | 12  | 17  | 20  | 13  | 11  | 10  | 10  | 13  | 5   | 5   | 5   | 7   | 4   | 6   | 8   | 11  | 6   | 17  | 5   |
| CRO      | 0.000           | 9               | 9   | 5   | 8   | 9   | 4   | 9   | 9   | 9   | 7   | 3   | 4   | 4   | 2   | 3   | 6   | 11  | 2   | 6   | 3   |
| CDH      | 0.791           | 1               | 1   | 1   | 1   | 1   | 1   | 1   | 1   | 1   | 1   | 0   | 0   | 0   | 1   | 2   | 2   | 0   | 1   | 1   | 0   |
| Cytb562  | 0.922           | 0               | 0   | 1   | 1   | 0   | 0   | 0   | 1   | 1   | 1   | 0   | 0   | 0   | 2   | 3   | 0   | 2   | 0   | 0   |     |
| ODC      | 0.754           | 2               | 2   | 3   | 3   | 2   | 3   | 3   | 5   | 5   | 7   | 5   | 4   | 5   | 4   | 3   | 2   | 1   | 5   | 1   | 2   |
| GLP      | 0.000           | 2               | 3   | 1   | 11  | 6   | 8   | 1   | 2   | 6   | 3   | 5   | 10  | 10  | 6   | 3   | 11  | 1   | 7   | 0   | 3   |
| QRD      | 0.885           | 4               | 4   | 2   | 1   | 3   | 3   | 4   | 1   | 1   | 4   | 1   | 1   | 1   | 3   | 2   | 2   | 2   | 4   | 3   | 1   |
| DyP      | 0.000           | 0               | 0   | 1   | 2   | 5   | 3   | 11  | 2   | 1   | 0   | 2   | 0   | 0   | 0   | 0   | 2   | 0   | 4   | 0   |     |
| HTP      | 0.000           | 24              | 24  | 5   | 10  | 8   | 4   | 16  | 3   | 4   | 3   | 5   | 5   | 4   | 6   | 3   | 2   | 5   | 3   | 8   | 6   |
| P450     | 0.000           | 109             | 104 | 144 | 215 | 144 | 130 | 249 | 190 | 187 | 149 | 250 | 206 | 190 | 130 | 164 | 238 | 101 | 115 | 139 | 126 |

**Species** : Ab, *A. bisporus* var *bisporus*; Abb, *A. bisporus* var *burnettii*; Ad, *Auricularia delicata*; Cc, *C. cinerea*; Cp, *C. puteana*; Da, *Dacryopinax* sp.; Ds, *D. squalens*; Fm, *F. mediterranea*; Fp, *F. pinicola*; Gt, *G. trabeum*; Ha, *H. annosum*; Lb, *L. bicolor*; Pc, *P. chrysosporium*; Pp, *P. placenta*; Ps, *P. strigosozonata*; Sc, *S. commune*; Sh, *S. hirsutum*; Sl, *S. lacrymans*; Tv, *T. versicolor*; Wc, *W. cocos*.

**Genes** : GH, glycoside hydrolases; CE, carbohydrate esterases; POD, class II peroxidases; MCO, multicopper oxidases; CRO, copper radical oxidases; CDH, cellobiose dehydrogenase; Cytb562, cytochrome b562; ODC, oxalate decarboxylases; GLP, Fe(III)-reducing glycopeptides; QRD, quinone reductases; DyP, dye-decolorizing peroxidases; HTP, heme-thiolate peroxidases; P450, cytochromes P450. P values indicate strength of rejection of model of random diversification in CAFE analyses.

**Ecologies** : WR, white rot; BR, brown rot; ECM, mycorrhiza; S, non-wood decay saprotroph.

**Table S11.** Comparison of oxidoreductase encoding genes in *A. bisporus* var. *bisporus* and other Agaricomycotina.

| Species <sup>1</sup><br>Ecology <sup>2</sup> | Ab<br>HU  | Abb<br>HU | Cc<br>CP  | Ha<br>WR | Pc<br>WR  | Ad<br>WR   | Pst<br>WR | Fm<br>WR  | Ds<br>WR | Tv<br>WR  | Sh<br>WR | Sc<br>WR | Sl<br>BR | Pp <sup>4</sup><br>BR | Cp<br>BR | Gt<br>BR | Fp<br>BR | Wc<br>BR | Da<br>BR | Lb<br>ECM |
|----------------------------------------------|-----------|-----------|-----------|----------|-----------|------------|-----------|-----------|----------|-----------|----------|----------|----------|-----------------------|----------|----------|----------|----------|----------|-----------|
| Gene <sup>3</sup>                            |           |           |           |          |           |            |           |           |          |           |          |          |          |                       |          |          |          |          |          |           |
| LiP                                          | 0         | 0         | 0         | 0        | <b>10</b> | 0          | 0         | 0         | 0        | <b>10</b> | 0        | 0        | 0        | 0                     | 0        | 0        | 0        | 0        | 0        | 0         |
| MnP                                          | 2         | 2         | 0         | 8        | 5         | 5          | 10        | <b>16</b> | 9        | 13        | 5        | 0        | 0        | 0                     | 0        | 0        | 0        | 0        | 0        | 0         |
| VP                                           | 0         | 0         | 0         | 0        | 0         | 0          | 0         | 0         | <b>3</b> | 0         | 0        | 0        | 0        | 0                     | 0        | 0        | 0        | 0        | 0        | 0         |
| DyP                                          | 0         | 0         | 4         | 1        | 0         | <b>11</b>  | 5         | 3         | 1        | 2         | 2        | 0        | 0        | 2                     | 0        | 0        | 0        | 0        | 0        | 2         |
| HTP                                          | <b>24</b> | <b>24</b> | 8         | 5        | 3         | 16         | 8         | 4         | 4        | 3         | 10       | 3        | 3        | 5                     | 2        | 6        | 4        | 5        | 6        | 5         |
| GLX                                          | 3         | 3         | 0         | 0        | 1         | 2          | 3         | 0         | <b>5</b> | <b>5</b>  | 3        | 0        | 0        | 0                     | 0        | 0        | 0        | 0        | 0        | 0         |
| CRO1                                         | 2         | 2         | 2         | 1        | 1         | 0          | 0         | 1         | 1        | 1         | 0        | 0        | 0        | 0                     | 1        | 0        | 1        | 1        | 2        | <b>6</b>  |
| CRO2                                         | 2         | 2         | 2         | 2        | 1         | <b>4</b>   | 3         | 1         | 1        | 1         | 1        | 1        | 1        | 1                     | <b>4</b> | 1        | 1        | 1        | 0        | 2         |
| CRO3-5                                       | 1         | 1         | 0         | 1        | <b>3</b>  | 1          | 1         | 1         | 1        | 1         | 1        | 0        | 1        | 1                     | 0        | 0        | 1        | 1        | 0        | 2         |
| CRO6                                         | 1         | 1         | 1         | 1        | 1         | <b>2</b>   | <b>2</b>  | 1         | 1        | 1         | 1        | 1        | 1        | 1                     | 1        | 1        | 1        | 1        | 1        | 0         |
| MCO                                          | 12        | 12        | <b>17</b> | 13       | 0         | 7          | 12        | 10        | 12       | 7         | 15       | 2        | 4        | 3                     | 6        | 4        | 5        | 5        | 0        | 9         |
| ODC                                          | 2         | 2         | 1         | 3        | <b>7</b>  | 3          | 3         | 3         | 5        | 6         | 3        | 5        | 3        | 5                     | 2        | 4        | 5        | 4        | 2        | 1         |
| CDH                                          | 1         | 1         | 1         | 1        | 1         | 1          | 1         | 1         | 1        | 1         | 1        | 1        | <b>2</b> | 0                     | 1        | 1        | 0        | 0        | 0        | 0         |
| P450                                         | 109       | ND        | 139       | 144      | 152       | <b>249</b> | 144       | 130       | 187      | 190       | 215      | 115      | 164      | 254                   | 238      | 130      | 190      | 206      | 126      | 101       |

<sup>1</sup>Species designations: Ab and Abb, *A. bisporus* strains; Ha, *H. annosum*; Pc, *P. chrysosporium*; Ad, *Auricularia delicata*; Pst, *P. strigosozonata*; Fm, *F. mediterranea*; Ds, *D. squalens*; Tv, *T. versicolor*; Sh, *S. hirsutum*; Sc, *S. commune*; Sl, *S. lacrymans*; Pp, *P. placenta*; Cp, *C. puteana*; Gt, *G. trabeum*; Fp, *F. pinicola*; Wc, *W. cocos*; Da, *Dacryopinax* sp.; Cc, *C. cinerea*; Lb, *L. bicolor*. <sup>2</sup>Ecology: CP, coprophilic; WR, White-rot; BR, Brown-rot; HU, Humicolous; ECM, mycorrhiza. <sup>3</sup>Gene: LiP, lignin peroxidase; MnP, Manganese peroxidase; VP, Versatile peroxidase; DyP, Dye degrading peroxidase; HTP, Heme thiol peroxidases; GLX, copper radical oxidase glyoxal oxidase; CRO, Copper radical oxidase nomenclature based on *P. chrysosporium*; MCO, Multicopper Oxidase; ODC, oxalate decarboxylase; CDH, Cellobiose dehydrogenase; P450, cytochrome P450s. <sup>4</sup>*P. placenta* estimate of CYPs is inflated by allelism.

**Table S12.** Up-regulation of transcripts coding for oxidoreductases potentially involved in degradation of lignin and related compounds in *A. bisporus* mycelium grown on agar medium (culture) or compost. Genes significantly up-regulated >10-fold with a p-value FDR, modified t test <0.05 are shown.

| Prot ID             | Average array signal <sup>2</sup> |         | Ratio <sup>3</sup> | P value <sup>4</sup> | Broad category <sup>5</sup> | Putative function            | SS <sup>5</sup> |
|---------------------|-----------------------------------|---------|--------------------|----------------------|-----------------------------|------------------------------|-----------------|
|                     | Compost                           | Culture | Compost/Culture    | Compost/Culture      |                             |                              | Prob            |
| 193563              | 20890                             | 14      | 1492               | 0.0009               | HTP                         | Aromatic peroxygenase        | 1               |
| 183646 <sup>6</sup> | 2618                              | 5       | 523                | 0.0021               | GMC OR                      | Model #141436 preferred      |                 |
| 207786              | 1421                              | 13      | 109                | 0.0006               | HTP                         | Aromatic peroxygenase        | -               |
| 139148              | 39882                             | 369     | 108                | 0.0173               | MCO                         | Laccase <i>sensu stricto</i> | 0.999           |
| 146228              | 36073                             | 381     | 94                 | 0.0152               | MCO                         | Laccase <i>sensu stricto</i> | 0.999           |
| 195432              | 9776                              | 108     | 90                 | 0.0009               | HTP                         | Aromatic peroxygenase        | 1               |
| 195436              | 6838                              | 116     | 58                 | 0.0011               | HTP                         | Aromatic peroxygenase        | 1               |
| 211194              | 3441                              | 64      | 53                 | 0.0003               | GMC OR                      |                              | 0.901           |
| 193903              | 18844                             | 395     | 47                 | 0.0034               | CRO                         | GLX-like                     | 0.917           |
| 195553              | 39479                             | 944     | 41                 | 0.0020               | GMC OR                      | Methanol oxidase (probable)  | -               |
| 217653              | 10027                             | 276     | 36                 | 0.0020               | GMC OR                      |                              | 0.985           |
| 181085              | 8335                              | 236     | 35                 | 0.0003               | CRO                         | CRO3-like                    | 1               |
| 226793              | 11229                             | 321     | 34                 | 0.0053               | HTP                         | Aromatic peroxygenase        | 0.999           |
| 188295              | 6150                              | 216     | 28                 | 0.0132               | GMC OR                      |                              | 0.999           |
| 186833              | 186                               | 7       | 26                 | 0.0011               | HTP                         | Aromatic peroxygenase        | 0.997           |
| 134420              | 956                               | 40      | 23                 | 0.0100               | HTP                         | Aromatic peroxygenase        | 1               |
| 188178              | 7034                              | 313     | 22                 | 0.0431               | CDH                         |                              | 0.997           |
| 179427              | 3133                              | 149     | 21                 | 0.0130               | CRO                         | GLX-like                     | 0.996           |
| 193900              | 12246                             | 588     | 20                 | 0.0099               | CRO                         | GLX-like                     | 1               |
| 186880              | 12452                             | 709     | 17                 | 0.0007               | CYP P450                    | CYP64                        | 0.84            |
| 78998               | 90995                             | 5251    | 17                 | 0.0005               | CYP P450                    | CYP64                        | -               |
| 186683              | 7346                              | 430     | 17                 | 0.0006               | CYP P450                    | CYP Not assigned             | -               |
| 195996              | 5485                              | 333     | 16                 | 0.0006               | CYP P450                    | CYP64                        | -               |
| 65123               | 222                               | 14      | 15                 | 0.0354               | HTP                         | Aromatic peroxygenase        | -               |
| 139842              | 1311                              | 84      | 15                 | 0.0065               | HTP                         | Aromatic peroxygenase        | 1               |
| 190967              | 5903                              | 385     | 15                 | 0.0272               | HTP                         | Aromatic peroxygenase        | 0.875           |
| 52638               | 182                               | 12      | 15                 | 0.0021               | HTP CPO                     | Chloroperoxidase             | -               |
| 190973              | 1248                              | 86      | 14                 | 0.0606               | HTP                         | Aromatic peroxygenase        | -               |
| 194024              | 23286                             | 1650    | 14                 | 0.0002               | CYP P450                    | CYP64                        | -               |
| 209229              | 1264                              | 101     | 12                 | 0.0039               | MCO                         | Laccase <i>sensu stricto</i> | 1               |
| 190985              | 1978                              | 160     | 12                 | 0.0423               | HTP                         | Aromatic peroxygenase        | 1               |
| 78318               | 21052                             | 1703    | 12                 | 0.0004               | CYP P450                    | CYP64                        | 0.927           |
| 190943              | 2683                              | 222     | 12                 | 0.0184               | HTP                         | Aromatic peroxygenase        | -               |
| 64972               | 751                               | 65      | 11                 | 0.0434               | HTP                         | Aromatic peroxygenase        | -               |

<sup>1</sup> Ranked according to those oxidoreductases with highest array signals on compost relative to culture. Listing includes only those 36 genes exhibiting >10-fold ratios and previously implicated in oxidative degradation of lignin and related aromatic compounds. <sup>2</sup> mean expression values from four biological replicates <sup>3</sup> fold change in transcript levels calculated from the mean expression value of culture and compost samples. <sup>4</sup> p-value FDR, modified t test. <sup>5</sup> Abbreviations: HTP, Heme-thiol peroxidase; GMC OR, Glucose-methanol-choline. <sup>6</sup> 5'-editing needed. Alternative model #14143 is preferred and features a predicted secretion signal.

**Table S13.** Comparison of genes encoding secreted proteases in *A. bisporus* (light grey) and other Agaricomycotina (coprophilic, dark grey; brown rots, brown; white rots, white; ectomycorrhizal symbiont, green)

| MEROPS ID | Ab | Abb | Cc | Cp | Fp | Wc | Gt | Sl | Dsp | Ad | Tv | Ds | Sh | Ps | Sc | Fm | Pc | Lb |
|-----------|----|-----|----|----|----|----|----|----|-----|----|----|----|----|----|----|----|----|----|
| S09X      | 32 | 36  | 51 | 35 | 21 | 20 | 24 | 22 | 22  | 42 | 32 | 31 | 37 | 34 | 38 | 24 | 13 | 26 |
| A01A      | 11 | 12  | 9  | 33 | 23 | 24 | 21 | 18 | 8   | 20 | 26 | 25 | 22 | 24 | 16 | 16 | 19 | 19 |
| S08A      | 10 | 11  | 11 | 16 | 15 | 19 | 8  | 13 | 14  | 55 | 27 | 19 | 21 | 9  | 11 | 13 | 13 | 10 |
| S10       | 9  | 8   | 3  | 6  | 8  | 8  | 9  | 9  | 9   | 16 | 19 | 14 | 10 | 13 | 3  | 8  | 7  | 4  |
| M38       | 6  | 3   | 1  | 1  | 2  | 1  | 2  | 0  | 0   | 6  | 1  | 1  | 1  | 0  | 1  | 0  | 0  | 1  |
| S33       | 5  | 6   | 4  | 4  | 7  | 11 | 3  | 5  | 5   | 39 | 5  | 6  | 7  | 12 | 7  | 8  | 6  | 2  |
| C14B      | 3  | 2   | 0  | 1  | 1  | 1  | 1  | 1  | 1   | 1  | 2  | 0  | 1  | 1  | 2  | 1  | 2  | 3  |
| C26       | 3  | 4   | 0  | 1  | 0  | 1  | 0  | 0  | 0   | 0  | 0  | 0  | 1  | 0  | 0  | 0  | 0  | 1  |
| C46       | 3  | 2   | 3  | 0  | 0  | 0  | 1  | 1  | 0   | 0  | 2  | 2  | 1  | 2  | 0  | 1  | 0  | 2  |
| M35       | 3  | 3   | 0  | 0  | 0  | 0  | 2  | 0  | 0   | 4  | 2  | 2  | 0  | 2  | 4  | 0  | 1  | 1  |
| M36       | 3  | 3   | 7  | 3  | 0  | 1  | 2  | 0  | 1   | 8  | 3  | 5  | 3  | 3  | 3  | 2  | 0  | 6  |
| C56       | 2  | 1   | 4  | 1  | 1  | 0  | 1  | 2  | 1   | 5  | 0  | 1  | 2  | 2  | 3  | 5  | 2  | 2  |
| M12A      | 2  | 2   | 3  | 2  | 4  | 3  | 2  | 3  | 2   | 2  | 3  | 3  | 4  | 3  | 2  | 4  | 2  | 3  |
| M28X      | 2  | 2   | 1  | 1  | 1  | 1  | 1  | 1  | 1   | 0  | 1  | 0  | 1  | 2  | 1  | 0  | 0  | 1  |
| M43B      | 2  | 2   | 21 | 0  | 0  | 0  | 0  | 0  | 0   | 5  | 2  | 1  | 1  | 1  | 0  | 0  | 0  | 3  |
| S28       | 2  | 3   | 2  | 5  | 4  | 3  | 2  | 3  | 1   | 1  | 3  | 4  | 2  | 2  | 4  | 2  | 2  | 2  |
| S53       | 2  | 2   | 2  | 16 | 21 | 14 | 9  | 7  | 8   | 13 | 22 | 21 | 14 | 10 | 4  | 5  | 6  | 6  |
| C13       | 1  | 1   | 0  | 1  | 1  | 0  | 1  | 1  | 0   | 1  | 1  | 0  | 1  | 0  | 1  | 0  | 0  | 0  |
| M14A      | 1  | 1   | 1  | 0  | 0  | 1  | 1  | 1  | 0   | 0  | 1  | 0  | 0  | 0  | 2  | 0  | 0  | 1  |
| M18       | 1  | 1   | 1  | 5  | 2  | 0  | 4  | 1  | 0   | 5  | 1  | 0  | 1  | 1  | 2  | 0  | 1  | 2  |
| M19       | 1  | 1   | 0  | 0  | 0  | 0  | 1  | 0  | 0   | 0  | 0  | 0  | 0  | 0  | 0  | 0  | 0  | 0  |
| M28A      | 1  | 1   | 8  | 1  | 2  | 1  | 1  | 1  | 1   | 5  | 1  | 0  | 2  | 3  | 0  | 1  | 0  | 1  |
| M28E      | 1  | 2   | 4  | 4  | 1  | 1  | 2  | 0  | 1   | 7  | 4  | 3  | 0  | 0  | 3  | 0  | 0  | 1  |
| M76       | 1  | 1   | 1  | 0  | 0  | 1  | 0  | 2  | 0   | 1  | 0  | 0  | 0  | 1  | 1  | 1  | 0  | 0  |
| S01C      | 1  | 1   | 1  | 0  | 1  | 1  | 1  | 0  | 1   | 0  | 0  | 0  | 0  | 0  | 0  | 0  | 1  | 1  |
| S12       | 1  | 1   | 0  | 0  | 1  | 3  | 1  | 0  | 1   | 2  | 2  | 3  | 1  | 1  | 0  | 0  | 0  | 0  |
| S16       | 1  | 1   | 1  | 1  | 1  | 1  | 1  | 0  | 0   | 0  | 1  | 1  | 0  | 0  | 1  | 0  | 0  | 0  |
| S26B      | 1  | 1   | 1  | 0  | 1  | 1  | 1  | 1  | 1   | 1  | 1  | 1  | 1  | 1  | 1  | 1  | 1  | 1  |

Species designations: Ab, *A. bisporus*; Abb, *A. bisporus burnettii*; Cc, *Coprinopsis cinerea*; Cp, *Coniophora puteana*; Fp, *Fomitopsis pinicola*; Wc, *Wolfiporia cocos*; Gt, *Gloeophyllum trabeum*; Sl, *Serpula lacrymans*; Dsp, *Dacryopinax* sp.; Ad, *Auricularia delicata*; Tv, *Trametes versicolor*; Ds, *Dichomitus squalens*; Sh, *Stereum hirsutum*; Ps, *Punctularia strigosozonata*; Sc, *Schizophyllum commune*; Fm, *Fomitoporia mediterranea*; Pc, *Phanerochaete chrysosporium*; Lb, *Laccaria bicolor*.

**Table S14.** Up-regulation of transcripts coding for proteases potentially involved in degradation of compost proteins in *A. bisporus* var. *bisporus* mycelium grown on agar medium (Culture), casing layer (Casing), compost or in fruiting body. Genes showing an up-regulation >10-fold on compost are presented. Protease sequences were identified by using the MEROPS database. Non-significant values (p-value FDR, modified t test >0.05) are marked in grey.

| SEQ_ID | MEROPS family | Expression Levels |         |         |               | Expression ratios |         |                 |           |                       |           |
|--------|---------------|-------------------|---------|---------|---------------|-------------------|---------|-----------------|-----------|-----------------------|-----------|
|        |               | Casing            | Compost | Culture | Fruiting Body | Casing/Culture    | P value | Compost/Culture | P value   | Fruiting Body/Culture | P value   |
| 122979 | C56           | 1510              | 32411   | 56      | 24            | 0.047             | 0.09    | 573.903         | 0.000101  | 0.418                 | 0.286     |
| 133541 | S09X          | 751               | 87557   | 490     | 782           | 0.009             | 0.02    | 178.739         | 0.000383  | 1.597                 | 0.0442    |
| 212650 | S08A          | 37                | 15996   | 101     | 66            | 0.002             | 0.06    | 158.101         | 0.000138  | 0.657                 | 0.0584    |
| 68978  | S10           | 1380              | 108057  | 769     | 880           | 0.013             | 0.06    | 140.572         | 0.00008   | 1.144                 | 0.494     |
| 180108 | S12           | 45                | 2331    | 17      | 81            | 0.02              | 0.02    | 137.523         | 0.000335  | 4.78                  | 0.0288    |
| 209748 | S09X          | 280               | 14774   | 121     | 244           | 0.019             | 0.00    | 122.098         | 0.000352  | 2.013                 | 0.00579   |
| 194648 | S08A          | 1255              | 68168   | 652     | 76            | 0.018             | 0.56    | 104.584         | 0.000306  | 0.116                 | 0.000615  |
| 134948 | M43B          | 10275             | 90941   | 994     | 386           | 0.113             | 0.09    | 91.478          | 0.000087  | 0.389                 | 0.0211    |
| 196213 | S09X          | 353               | 17166   | 250     | 843           | 0.021             | 0.14    | 68.785          | 0.00104   | 3.379                 | 0.0629    |
| 188444 | M28X          | 3312              | 15299   | 229     | 2362          | 0.217             | 0.00    | 66.824          | 0.000618  | 10.318                | 0.00392   |
| 183321 | S08A          | 5850              | 83158   | 1384    | 1575          | 0.07              | 0.05    | 60.077          | 0.000361  | 1.137                 | 0.382     |
| 191440 | S09X          | 1029              | 18571   | 363     | 545           | 0.055             | 0.02    | 51.199          | 0.000421  | 1.503                 | 0.0527    |
| 213137 | S10           | 1061              | 27540   | 583     | 697           | 0.039             | 0.26    | 47.227          | 0.000263  | 1.195                 | 0.514     |
| 196269 | S09X          | 136               | 5682    | 130     | 8             | 0.024             | 0.93    | 43.737          | 0.000737  | 0.059                 | 0.0000136 |
| 211605 | S33           | 146               | 26561   | 630     | 41            | 0.006             | 0.00    | 42.185          | 0.0144    | 0.066                 | 0.000683  |
| 192194 | S33           | 231               | 8912    | 232     | 714           | 0.026             | 0.98    | 38.35           | 0.00715   | 3.072                 | 0.000127  |
| 195776 | S28           | 8539              | 21253   | 642     | 820           | 0.402             | 0.02    | 33.128          | 0.000096  | 1.278                 | 0.161     |
| 120846 | S08A          | 110               | 743     | 24      | 84            | 0.148             | 0.00    | 31.314          | 0.00134   | 3.554                 | 0.00267   |
| 191068 | S09X          | 860               | 13566   | 445     | 347           | 0.063             | 0.12    | 30.466          | 0.00843   | 0.779                 | 0.192     |
| 181785 | S10           | 180               | 1643    | 55      | 209           | 0.11              | 0.00    | 29.993          | 0.0632    | 3.824                 | 0.00213   |
| 193513 | I51           | 895               | 13829   | 473     | 1063          | 0.065             | 0.04    | 29.222          | 0.0258    | 2.246                 | 0.00804   |
| 222358 | S28           | 800               | 8249    | 293     | 16            | 0.097             | 0.04    | 28.181          | 0.000929  | 0.054                 | 0.00823   |
| 74932  | M36           | 1244              | 116532  | 4564    | 128           | 0.011             | 0.20    | 25.532          | 0.000395  | 0.028                 | 0.0000953 |
| 179502 | S09X          | 432               | 4448    | 194     | 138           | 0.097             | 0.00    | 22.908          | 0.00139   | 0.709                 | 0.0903    |
| 226558 | S09X          | 620               | 12651   | 570     | 427           | 0.049             | 0.64    | 22.178          | 0.00089   | 0.748                 | 0.0762    |
| 115977 | S09X          | 73                | 79      | 4       | 49            | 0.923             | 0.00    | 17.869          | 0.00613   | 10.965                | 0.0276    |
| 200866 | S09X          | 928               | 13725   | 830     | 1415          | 0.068             | 0.51    | 16.533          | 0.00085   | 1.705                 | 0.0493    |
| 194743 | S09X          | 966               | 4725    | 306     | 183           | 0.204             | 0.01    | 15.416          | 0.0000771 | 0.596                 | 0.0228    |
| 120844 | S08A          | 773               | 4573    | 299     | 530           | 0.169             | 0.00    | 15.271          | 0.00188   | 1.771                 | 0.0566    |
| 212363 | A01A          | 31                | 3008    | 200     | 64            | 0.01              | 0.04    | 15.041          | 0.0366    | 0.322                 | 0.0238    |
| 194099 | S33           | 158               | 22856   | 1577    | 192           | 0.007             | 0.00    | 14.492          | 0.000652  | 0.121                 | 0.000981  |
| 116475 | S33           | 3672              | 15701   | 1106    | 1389          | 0.234             | 0.04    | 14.194          | 0.000315  | 1.256                 | 0.474     |
| 118415 | M17           | 189               | 1512    | 108     | 75            | 0.125             | 0.03    | 13.995          | 0.00172   | 0.692                 | 0.462     |
| 222775 | M28E          | 8665              | 68315   | 4942    | 4969          | 0.127             | 0.59    | 13.822          | 0.000147  | 1.005                 | 0.996     |
| 188452 | S33           | 364               | 658     | 63      | 167           | 0.553             | 0.01    | 10.469          | 0.00695   | 2.658                 | 0.147     |
| 189957 | M01           | 1420              | 13443   | 1288    | 1609          | 0.106             | 0.65    | 10.436          | 0.000387  | 1.249                 | 0.387     |
| 142735 | A01A          | 14725             | 7083    | 683     | 126           | 2.079             | 0.00    | 10.364          | 0.000241  | 0.184                 | 0.00704   |
| 115910 | S09X          | 1336              | 5023    | 490     | 1306          | 0.266             | 0.00    | 10.261          | 0.00452   | 2.667                 | 0.000291  |
| 179046 | S09X          | 1728              | 10382   | 1021    | 1709          | 0.166             | 0.01    | 10.169          | 0.000553  | 1.674                 | 0.215     |
| 223428 | S09X          | 1822              | 11559   | 1139    | 1933          | 0.158             | 0.03    | 10.145          | 0.000444  | 1.696                 | 0.229     |

**Table S15. A.** Gene regulation by humic substances in *Agaricus bisporus*.

| Rank                                                        | JGI_ID            | Ratio<br>humic/non-<br>humic | Motif<br>number | motif lowest<br><i>p</i> -value | Protein description                                |
|-------------------------------------------------------------|-------------------|------------------------------|-----------------|---------------------------------|----------------------------------------------------|
| 1                                                           | 190200            | 1561                         | 2.00            | 8.61E-06                        | cutinase                                           |
| 2                                                           | 227728            | 1219                         | 1.00            | 5.96E-06                        | glycoside hydrolase, family 12                     |
| 4                                                           | 190202            | 646                          | 1.00            | 2.03E-06                        | cutinase                                           |
| 6                                                           | 183646            | 524                          | 1.00            | 1.85E-06                        | pyranose dehydrogenase                             |
| 7                                                           | 195861            | 497                          | 1.00            | 1.14E-05                        | MFS sugar transporter                              |
| 8                                                           | 194576            | 406                          | 1.00            | 2.03E-06                        | alpha-N-arabinofuranosidase                        |
| 9                                                           | 226235            | 356                          | 2.00            | 4.73E-08                        | cellulose-growth-specific<br>protein               |
| 11                                                          | 190390            | 306                          | 1.00            | 9.26E-06                        | exoglucanase 3                                     |
| 12                                                          | 146117            | 238                          | 1.00            | 4.36E-06                        | glycoside hydrolase, family 88                     |
| 13                                                          | 212650            | 235                          | 1.00            | 4.53E-07                        | serine proteinase                                  |
| 15                                                          | 192849            | 208                          | 4.00            | 2.59E-07                        | glycoside hydrolase, family 5                      |
| 16                                                          | 194280            | 199                          | 1.00            | 4.71E-06                        | endoglucanase                                      |
| 20                                                          | 149407            | 140                          | 2.00            | 4.01E-06                        | small sub-unit laccase <i>sslcc</i>                |
| 24                                                          | 68978             | 107                          | 1.00            | 6.87E-07                        | serine proteinase                                  |
| 25                                                          | 194648            | 103                          | 2.00            | 5.93E-09                        | serine proteinase <i>spr1</i>                      |
| 27                                                          | 175634            | 101                          | 1.00            | 9.04E-05                        | hypothetical protein                               |
| 28                                                          | 211605            | 98                           | 1.00            | 5.21E-05                        | fumarylacetoacetate hydrolase<br>family            |
| 30                                                          | 79647             | 94                           | 1.00            | 7.70E-07                        | xylanase                                           |
| 31                                                          | 139148            | 93                           | 2.00            | 9.69E-08                        | laccase <i>lcc2</i>                                |
| 32                                                          | 211295            | 89                           | 2.00            | 7.99E-06                        | alpha amylase                                      |
| 33                                                          | 194521            | 88                           | 1.00            | 1.40E-05                        | exoglucanase                                       |
| 40                                                          | 146228            | 75                           | 2.00            | 1.38E-06                        | laccase <i>lcc1</i>                                |
| <b>Negative control on promoters of 33 random sequences</b> |                   |                              |                 |                                 |                                                    |
| 4008                                                        | 193722            | 1                            | 3               | 3.20E-06                        | hypothetical protein                               |
| 4018                                                        | 199045            | 1                            | 1               | 8.00E-06                        | hypothetical protein                               |
| 4029                                                        | 65196-<br>190694* | 1                            | 1               | 8.00E-06                        | hypothetical protein                               |
| 4024                                                        | 189364            | 1                            | 1               | 1.70E-05                        | transcription initiation factor<br>TFIID subunit 1 |
| 4026                                                        | 225676            | 1                            | 1               | 2.40E-05                        | prolyl-tRNA synthetase                             |
| 4011                                                        | 134340            | 1                            | 1               | 2.60E-05                        | ribose-phosphate<br>pyrophosphokinase              |
| 4021                                                        | 119786            | 1                            | 1               | 3.30E-05                        | short-chain<br>dehydrogenase/reductase SDR         |
| 4025                                                        | 189220            | 1                            | 1               | 4.00E-05                        | enoyl-CoA hydratase                                |
| 4012                                                        | 67030             | 1                            | 1               | 5.70E-05                        | ankyrin repeat protein                             |
| 4020                                                        | 209944            | 1                            | 1               | 7.20E-05                        | delta-12 fatty acid desaturase                     |
| 4010                                                        | 191839            | 1                            | 1               | 7.50E-05                        | deoxyhypusine synthase                             |

**Grey** – motif *p*-values of humic overexpressed genes lower than the control motif *p*-values. \* Protein IDs of the gene model used for expression study and of a better model used to define the promoter boundary.



Microarray derived gene expression data were compared and ranked as ratios of expression in humic/non-humic environments (i.e. expression in compost/ Average expression in culture, casing and as fruit bodies). The table shows the transcript ratios, rankings (highest to lowest) and protein description of 23 genes sharing the promoter motif, TC[CA][TG]G[AT][GTA]A[AC]AATCTC. The motif was discovered with the Motif-based sequence analysis tools (MEME Suite) 4.4 (<http://meme.sdsc.edu/>) applied on the 33+1 promoters (1566 bp upstream the ATG) of humic overexpressed genes + 4 promoters of *A. bisporus* var. *burnettii* genes homologous of laccase and serine proteinase overexpressed genes and 4 negative sequences (promoter of genes having a transcript ratio of 1). MAST tool was used to find the motif among the 33 control sequences. Lowest p-values of the motifs found among 33+1 promoters of humic overexpressed genes compared to those of motifs found among 33 promoters (of genes having a ratios of expression of 1 in humic/non-humic environments).

**B.** Genomic frequency of the humic-response motif in *A. bisporus* and in *C. cinereus*, *P. chrysosporium*, selected Agaricomycotina and two Ascomycetes with and without soil niches.

| Species                                        | Genome Size (Mb) | Expected Frequency (both directions) | Actual Frequency | Ratio of Actual/Expected Frequencies |
|------------------------------------------------|------------------|--------------------------------------|------------------|--------------------------------------|
| <i>Agaricus bisporus</i> var. <i>burnettii</i> | 32.8             | 31.24                                | 132              | 4.2                                  |
| <i>Agaricus bisporus</i> var. <i>bisporus</i>  | 30.4             | 28.98                                | 89               | 3.1                                  |
| <i>Coprinopsis cinereus</i>                    | 36.2             | 34.48                                | 69               | 2.0                                  |
| <i>Phanerochaete chrysosporium</i>             | 35.2             | 33.54                                | 62               | 1.8                                  |
| <i>Serpula lacrymans</i>                       | 42.7             | 40.76                                | 52               | 1.3                                  |
| <i>Tuber melanosporum</i>                      | 125              | 119.18                               | 143              | 1.2                                  |
| <i>Laccaria bicolor</i>                        | 59.1             | 56.54                                | 58               | 1.0                                  |
| <i>Cryptococcus neoformans</i>                 | 18.9             | 18.00                                | 18               | 1.0                                  |
| <i>Schizophyllum commune</i>                   | 38.6             | 36.84                                | 29               | 0.79                                 |
| <i>Botrytis cinerea</i>                        | 42.7             | 40.72                                | 29               | 0.72                                 |

**Table S16. A.** Comparison of fruiting body (FB) regulated transcripts from *A. bisporus* var. *bisporus*, *Laccaria bicolor* and *Schizophyllum commune*. Listed are all transcripts with a significant >10 fold up- or down-regulation in Agaricus FB compared to agar medium, as well as significantly regulated homologs from *L. bicolor* and *S. commune* (FB compared to agar medium). Expression data for *A. bisporus* and *L. bicolor* were generated by oligoarrays, *S. commune* data by massively parallel signature sequencing (MPSS). \* p-value FDR, modified t test < 0.05.

| <i>Agaricus bisporus</i>                 |                         | <i>Laccaria bicolor</i> |                         | <i>Schizophyllum commune</i> |                         | Putative function                  |
|------------------------------------------|-------------------------|-------------------------|-------------------------|------------------------------|-------------------------|------------------------------------|
| JGI<br>Protein ID                        | ratio<br>FB/Agar medium | JGI<br>Protein ID       | ratio<br>FB/Agar medium | JGI<br>Protein ID            | ratio<br>FB/Agar medium |                                    |
| <b>significantly* up (&gt;10-fold)</b>   |                         |                         |                         |                              |                         |                                    |
| 189424                                   | 391.9                   | 301146                  | 5.7                     | 73392                        | 9.4                     | Hypothetical protein               |
| 195454                                   | 241.8                   | 298461                  | 4.3                     | 258034                       | 21.1                    | Aromatic-ring hydroxylase          |
| 219810                                   | 184.7                   | 309640                  | 5.1                     | 72462                        | 28.5                    | Hypothetical protein               |
| 74558                                    | 58.6                    | 236299                  | 99.4                    | 258323                       | 23.4                    | RNA recognition motif. RNP-1       |
| 188626                                   | 53.2                    | 245697                  | 27.3                    | 64227                        | 10.6                    | Glycoside hydrolase 16             |
| 136509                                   | 49.7                    | 299929                  | 475.3                   | 235154                       | >3.5                    | Hypothetical protein               |
| 185602                                   | 25.7                    | 295954                  | 29                      | 69239                        | 5.1                     | FAD linked oxidase                 |
| 114425                                   | 21                      | 242884                  | 4.6                     | 13353                        | 76.9                    | Exonuclease                        |
| 225837                                   | 17                      | 254799                  | 3.2                     | 111512                       | 3.7                     | Fatty acid desaturase              |
| 194141                                   | 16.9                    | 300021                  | 6.4                     | 85903                        | 4.5                     | Hypothetical protein               |
| 191073                                   | 16.7                    | 306386                  | 5.6                     | 108884                       | 8.4                     | Hypothetical protein               |
| 200889                                   | 15.7                    | 312067                  | 3.6                     | 27681                        | 5.5                     | Hypothetical protein               |
| 83052                                    | 11.6                    | 306176                  | 5.3                     | 105081                       | 8.2                     | DNA-binding HORMA domain           |
| <b>significantly* down (&gt;10-fold)</b> |                         |                         |                         |                              |                         |                                    |
| 190902                                   | 0.01                    | 253329                  | 0.16                    | 50449                        | 0.18                    | Cytochrome P450, E-class. group IV |
| 19143                                    | 0.02                    | 308057                  | 0.35                    | 27314                        | 0.27                    | Hypothetical protein               |
| 205540                                   | 0.04                    | 305032                  | 0.07                    | 32888                        | 0.07                    | Glycoside hydrolase 5              |

**B.** Expression of *A. bisporus* var. *bisporus* and *Laccaria bicolor* homologs of transcription factor genes that have previously been shown to be involved in mushroom development in *Schizophyllum commune* and *Coprinopsis cinerea*. Homologs were identified using a bi-directional/reciprocal best hit analysis. <sup>1</sup>Expression data for *A. bisporus* and *L. bicolor* were generated by oligoarrays, <sup>2</sup>*S. commune* data by massively parallel signature sequencing (MPSS). Changes in gene expression with p-value FDR, modified t test < 0.05 were considered as significant, non-significant differences in gene expression compared to fruiting bodies are marked in grey. <sup>3</sup> compared to vegetative mycelium, as determined by northern analysis (40). <sup>4</sup> determined by northern analysis (41).

| <i>Schizophyllum commune</i> |      |                                                                |                 |          |        | <i>A. bisporus</i> var <i>bisporus</i> |           |                               |                 | <i>Laccaria bicolor</i> |           |                               |                 |
|------------------------------|------|----------------------------------------------------------------|-----------------|----------|--------|----------------------------------------|-----------|-------------------------------|-----------------|-------------------------|-----------|-------------------------------|-----------------|
|                              |      | Expression level <sup>2</sup>                                  |                 |          |        |                                        |           | Expression level <sup>1</sup> |                 |                         |           | Expression level <sup>1</sup> |                 |
| Protein ID                   | Name | Culture                                                        | Fruiting bodies |          |        | Protein ID                             | E value   | Culture                       | Fruiting bodies | Protein ID              | E value   | Culture                       | Fruiting bodies |
|                              |      |                                                                | Stage I         | Stage II | mature |                                        |           |                               |                 |                         |           |                               |                 |
| 257987                       | hom2 | 53                                                             | 2               | 75       | 23     | 192725                                 | 6,72E-28  | 8                             | 173             | 293988                  | 1,51E-52  | 16993                         | 3856            |
| 66861                        | fst4 | 82                                                             | 75              | 257      | 372    | 223670                                 | 0         | 2336                          | 4533            | 308722                  | 0         | 4698                          | 9218            |
| 114363                       | c2h2 | 17                                                             | 14              | 317      | 244    | 230069                                 | 5,47E-38  | 7                             | 766             | 487295                  | 4,34E-38  | 2660                          | 3659            |
| 257422                       | fst3 | 100                                                            | 35              | 234      | 363    | 191328                                 | 3,18E-102 | 3255                          | 12769           | 307309                  | 0         | 3556                          | 24281           |
| 255004                       | gat1 | 104                                                            | 22              | 437      | 138    | 195724                                 | 1,72E-55  | 232                           | 149             | 685209                  | 1,67E-55  | 2889                          | 3064            |
| 257652                       | hom1 | 90                                                             | 50              | 354      | 772    | 192433                                 | 3,11E-31  | 794                           | 3556            | 324166                  | 2,63E-28  | 2003                          | 5992            |
| 255701                       | bri1 | 26                                                             | 13              | 82       | 37     | 189729                                 | 1,92E-114 | 2139                          | 3372            | 700295                  | 4,36E-125 | 13211                         | 5276            |
| <i>Coprinopsis cinerea</i>   |      |                                                                |                 |          |        |                                        |           |                               |                 |                         |           |                               |                 |
| CC1G_01334                   | exp1 | up-regulated in fruiting bodies <sup>3</sup>                   |                 |          |        | 188638                                 | 1,26E-147 | 450                           | 319             | 644689                  | 8,76E-144 | 4936                          | 9363            |
| CC1G_07392                   | pcc1 | higher expressed in dikaryons than in monokaryons <sup>4</sup> |                 |          |        | 192530                                 | 5,44E-32  | 4151                          | 6119            | 386478                  | 5,42E-36  | 8499                          | 1708            |

## Supplemental Figures

**Figure S1.** Alignment of *A. bisporus* var. *bisporus* H97 genome scaffolds on *A. bisporus* genetic linkage map. Linkage groups (LG) corresponding to chromosomes are drawn on the left, scaffolds on the middle, and heat maps displaying distribution of single sequence repeats (SSRs) (in yellow), transposable elements (TEs) (in blue) and protein-coding gene models (GMs) (in green) per 25kbp-window on the right. The heat maps describe 98.2 %, 97.3 %, 98.3% of SSRs, TEs and GMs, respectively, found in the H97 genome. Increasing abundance of the different structures is represented by a color scale from light to darker colors.

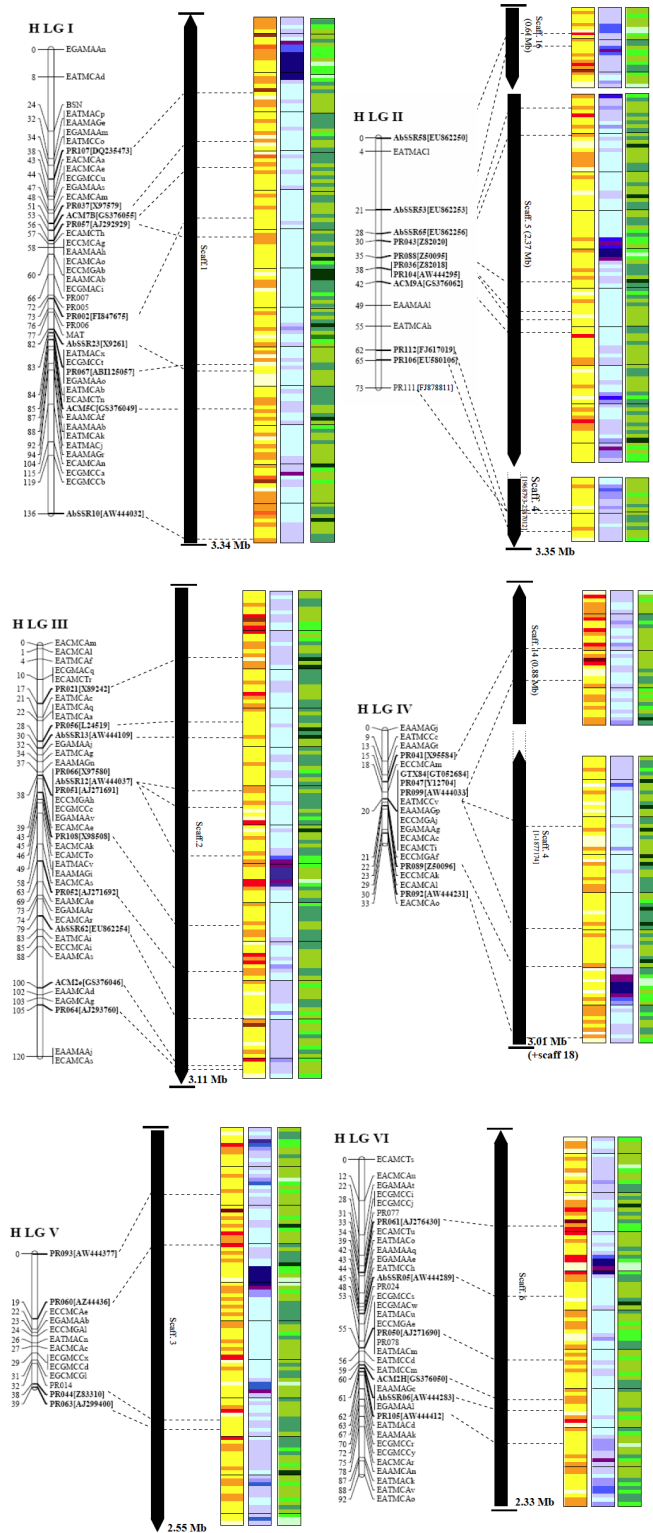

### H LG VII

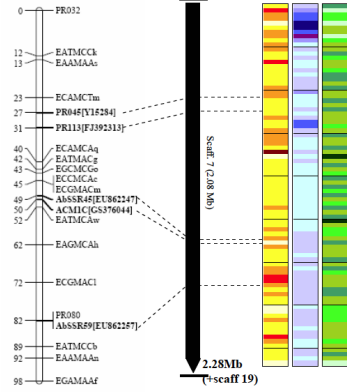

### H LG VIII

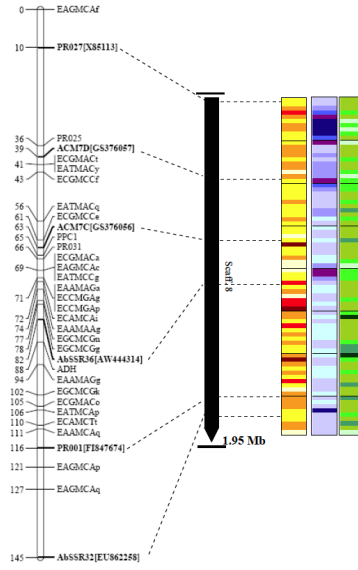

### H LG IX

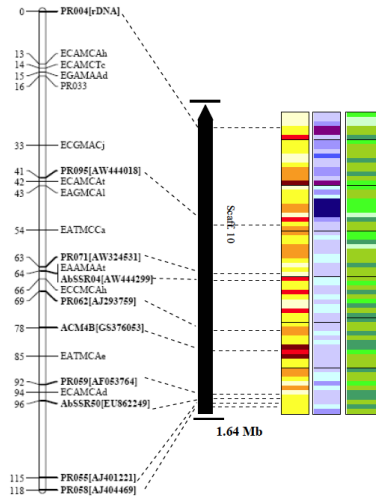

### H LG X

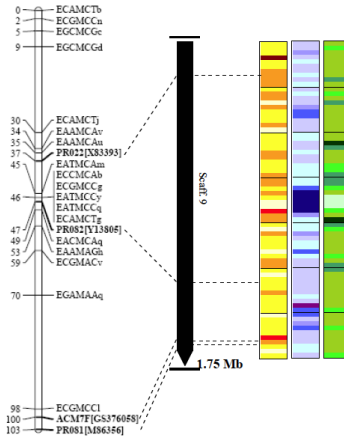

### H LG XII

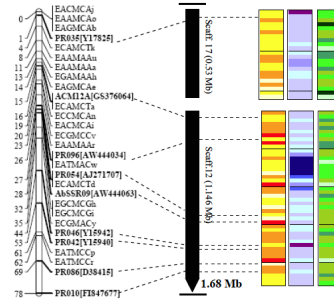

### H LG XI

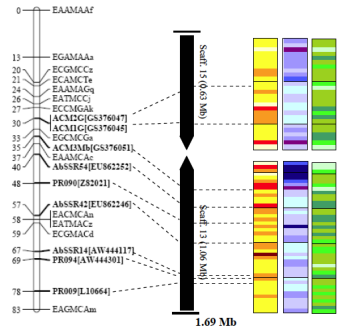

### H LG XIII

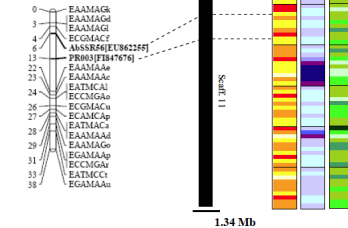

**Figure S2.** Macro synteny between *Agaricus bisporus* H97 scaffolds (right panel) and the 134 largest scaffolds of *A. bisporus* var *burnetti* JB137-S8 scaffolds (left panel). *A. bisporus* scaffolds are depicted by the colored blocks and *A. bisporus* var *burnetti* scaffolds are represented by gray blocks. Only regions larger than 5,000 bp are connected with links of colors matching those used for coloring *A. bisporus* scaffolds. Comparison between the two genomes sequences was performed with VISTA (<http://genome.lbl.gov/vista/>).

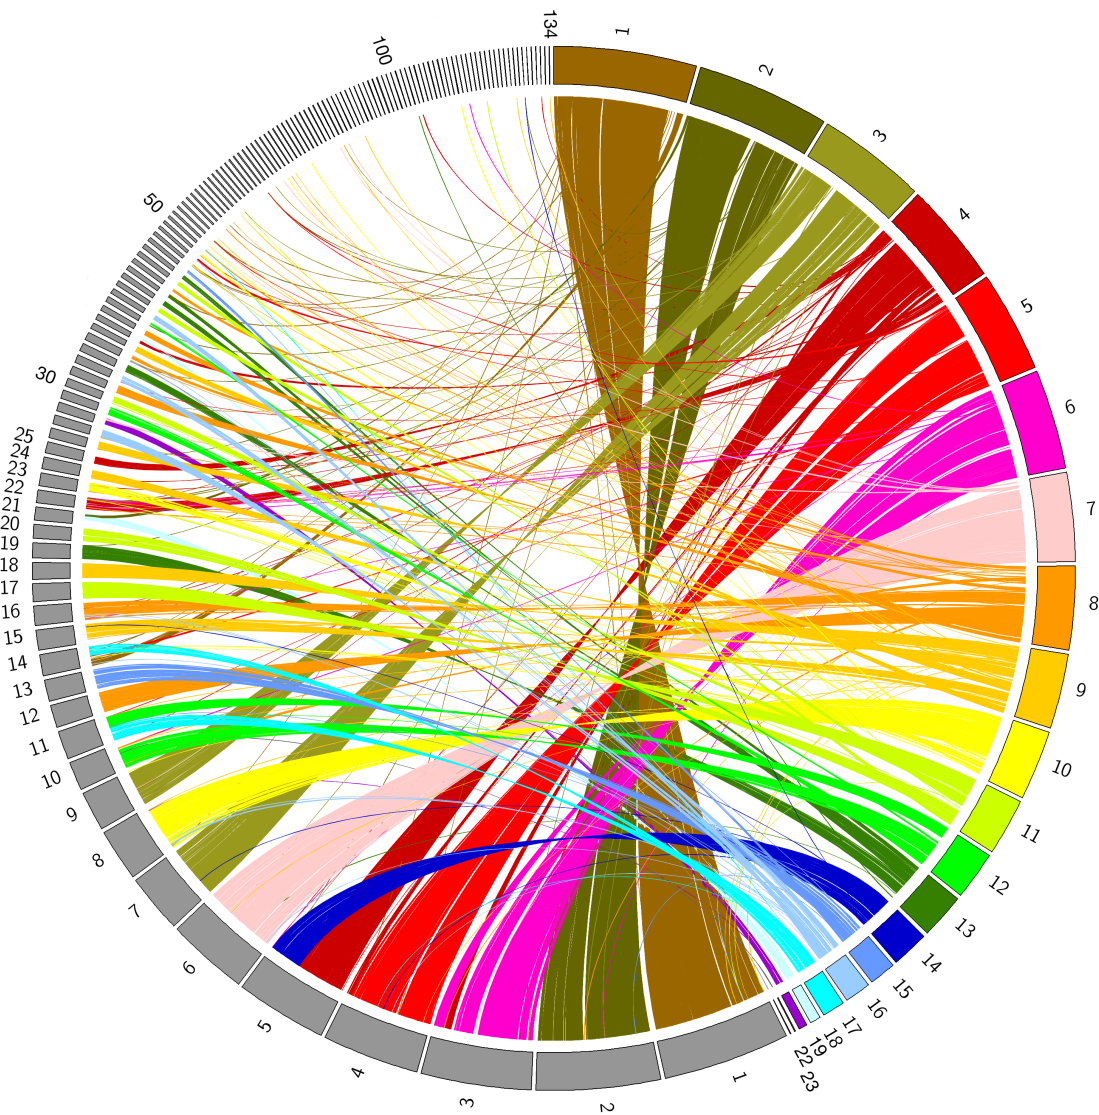

**Figure S3.** The diversity and distribution of class I and class II transposable elements in *A. bisporus* var. *bisporus* H97. **A.** Distribution in various TE families, number of copies and % genome assembly coverage. **B.** Average insertion age of full-length copies of LTR retrotransposons.

**A.**

*Agaricus bisporus* H97 Transposable elements diversity

|                        | Number of families | Number of copies | % Genome assembly coverage |
|------------------------|--------------------|------------------|----------------------------|
| Class 1 LTR Gypsy-like | 6                  | 574              | 3.5                        |
| Class 1 LTR Copia-like | 6                  | 453              | 1.96                       |
| Class 1 Other LTR      | 6                  | 84               | 0.16                       |
| Class 1 Non LTR        | 14                 | 285              | 1.39                       |
| Class 2 TIR            | 12                 | 220              | 0.4                        |
| Class 2 Helitron       | 1                  | 5                | 0.01                       |
| Not Categorized        | 171                | 2008             | 3.76                       |

**B.**

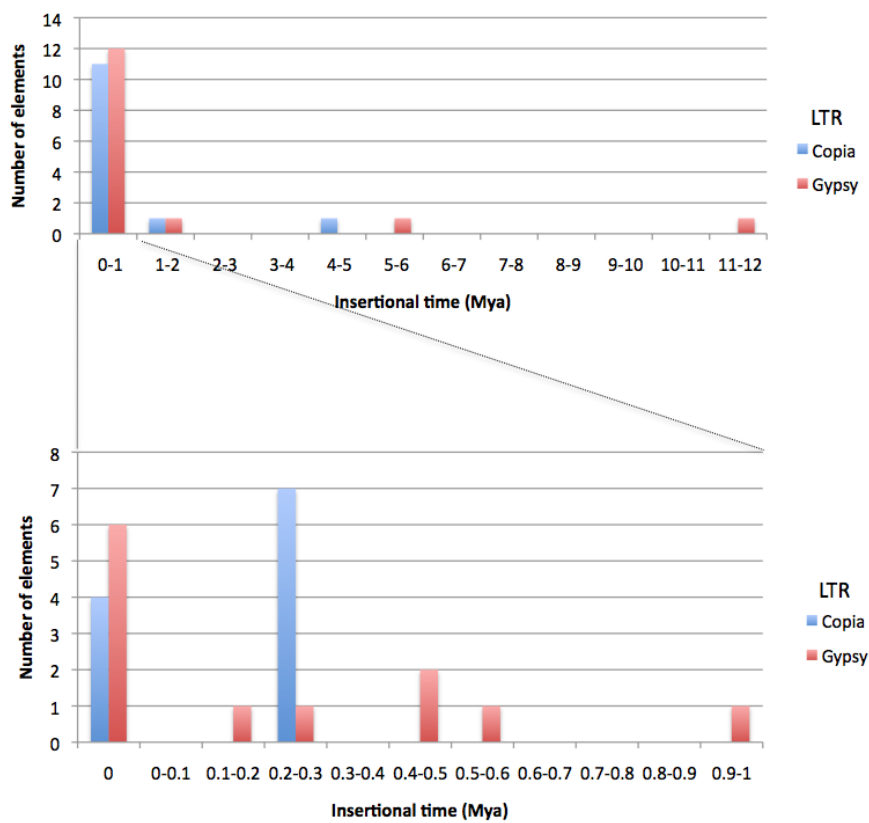

**Figure S4.** Organismal phylogeny produced with RAxML from a 36 genes dataset. Each branch is labeled with the confidence value from 1,000 bootstrapped topologies. Posterior probabilities are >0.95 for each branches. The separation time (in Myears) of some node was estimated using Floudas *et al.* (2012) and indicated in parentheses.

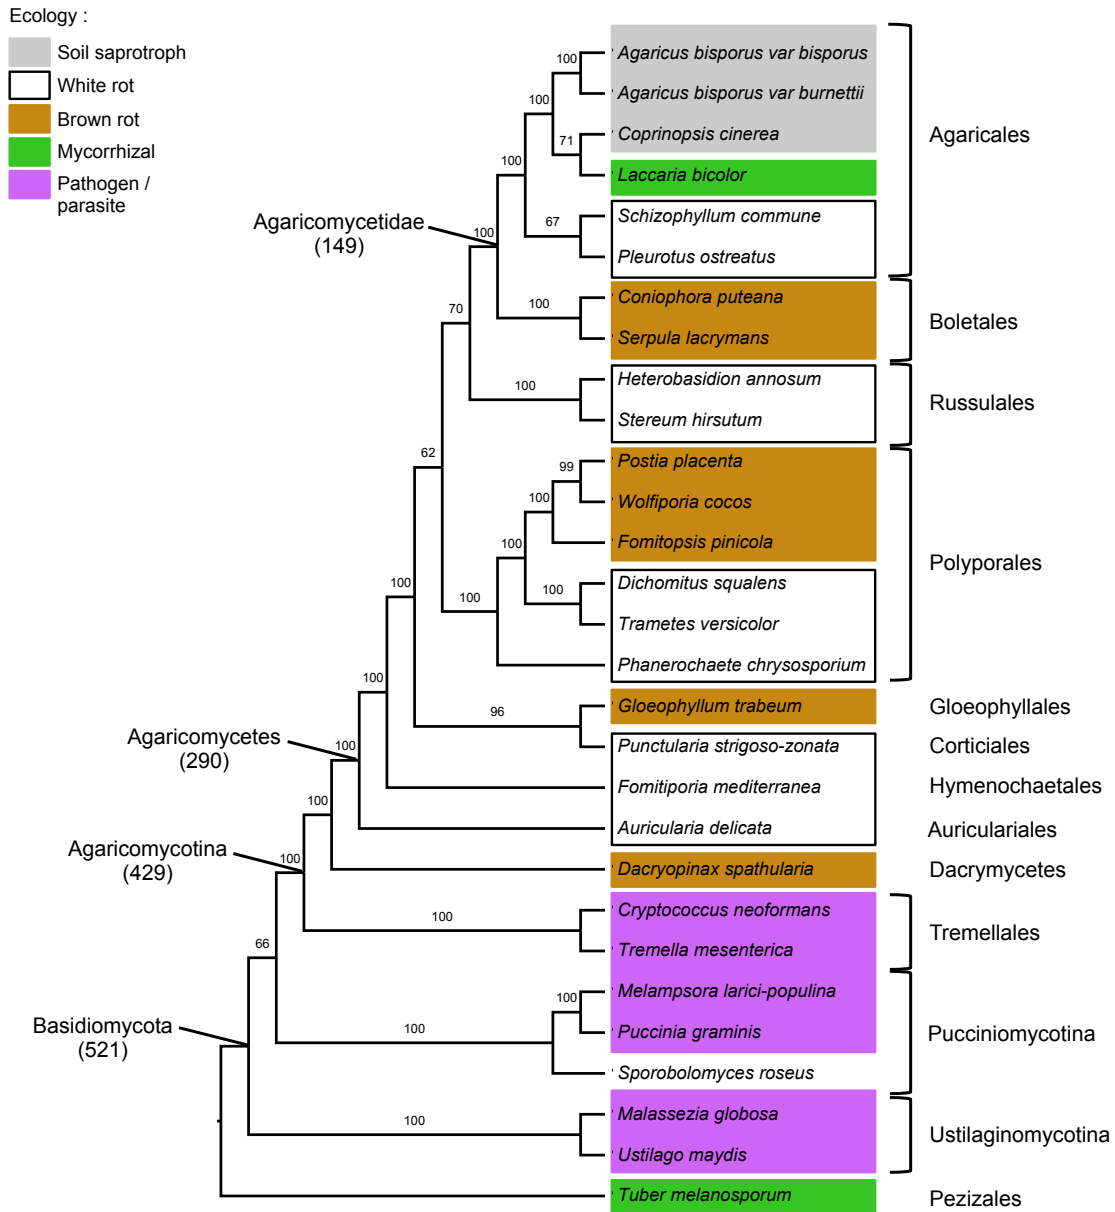



**Figure S5.** Genome redundancy in the *Agaricus bisporus* var. *bisporus* genome. The figure represents the total number of gene families in each species or node. The numerals on branches and pie charts at each branch terminus show the proportion of expanded (red), unchanged (black/grey) or contracted (blue) gene families along lineages by comparison to the putative pan-genome. CAFE analysis, p-value <0.001. MRCA, most recent common ancestor.

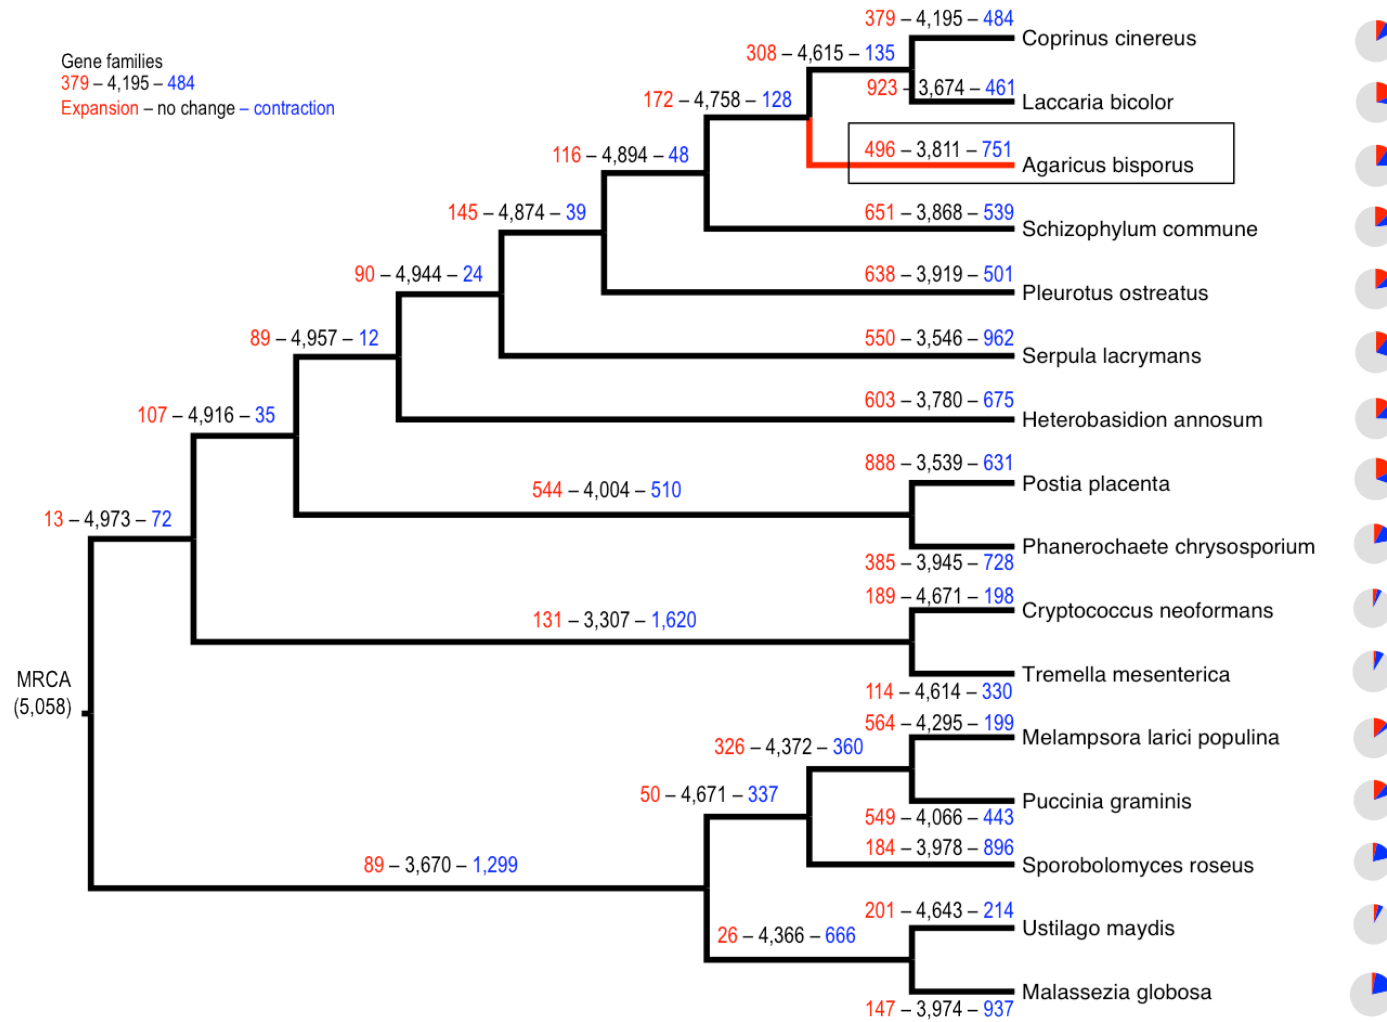

**Figure S6.** Hierarchical clustering of regulated transcripts from *A. bisporus* var. *bisporus* either grown on defined agar-medium [Culture], compost [Compost] or casing layer [Casing] or in fruiting bodies [Mushroom].

**A.** Transcripts coding for carbohydrate-active enzymes (CAZymes) potentially involved in degradation of polysaccharides.

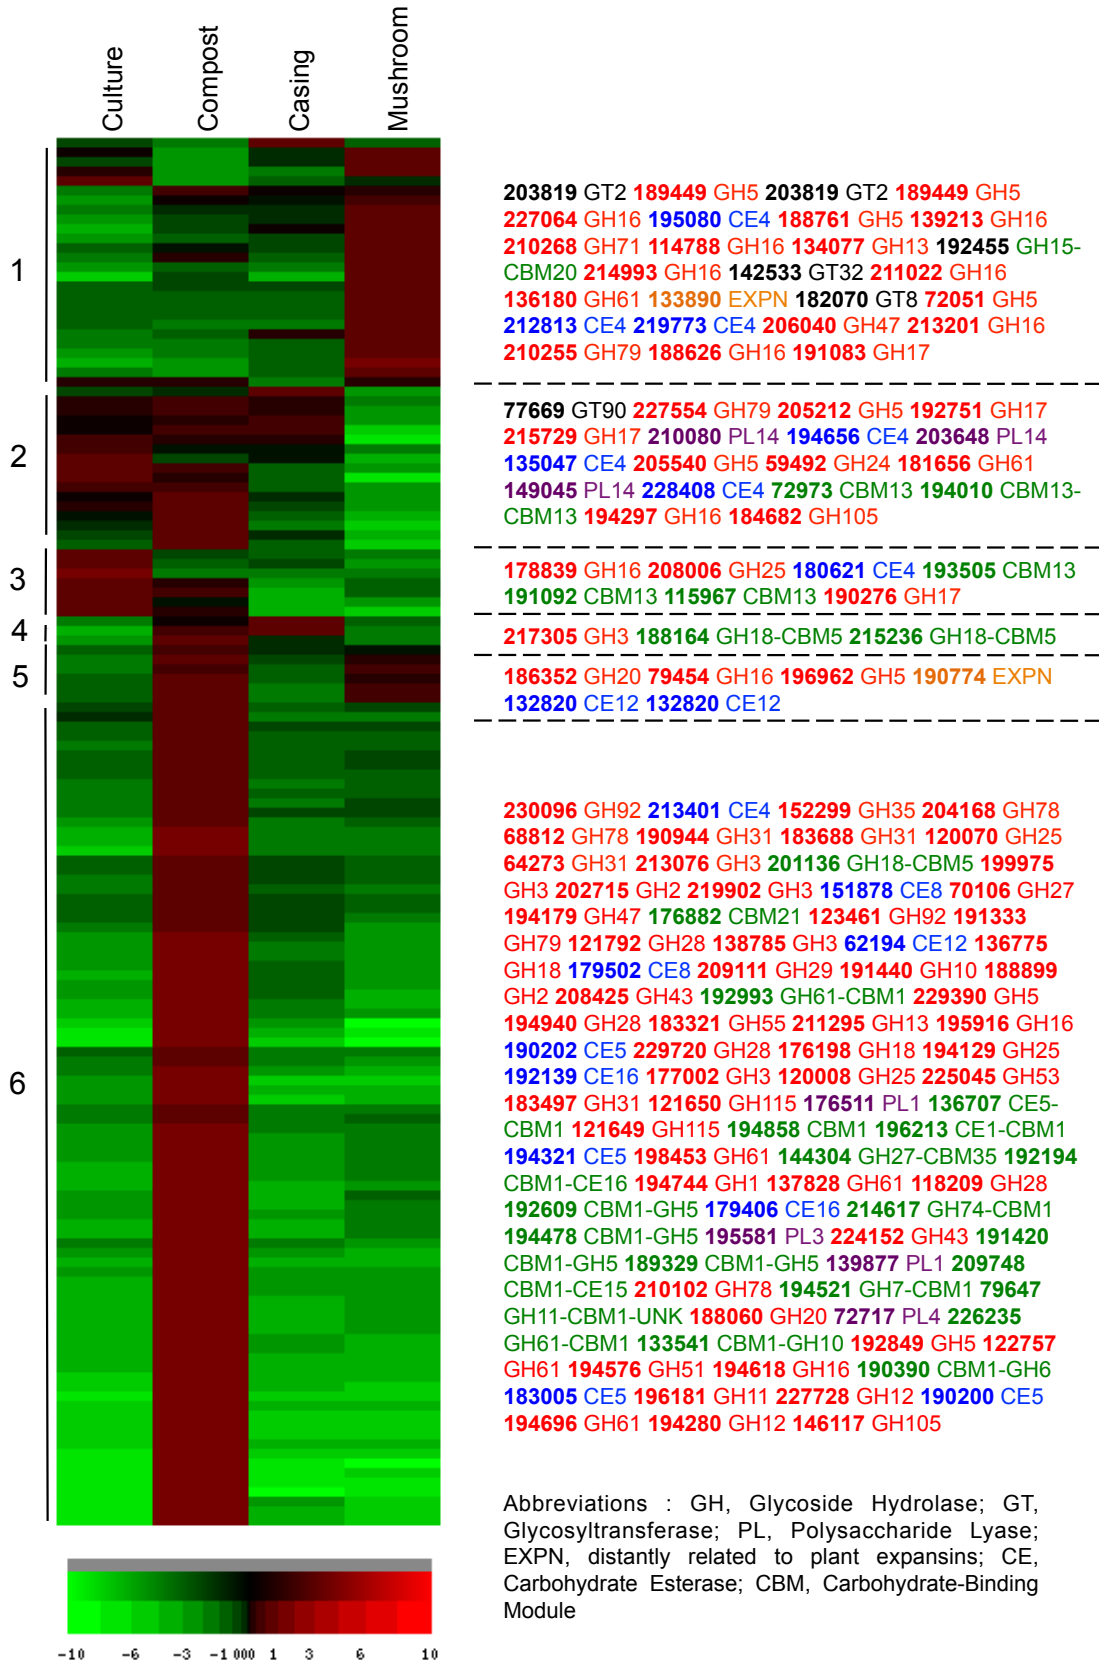

**B. Transcripts coding for oxidoreductases potentially involved in degradation of lignin and related compounds**

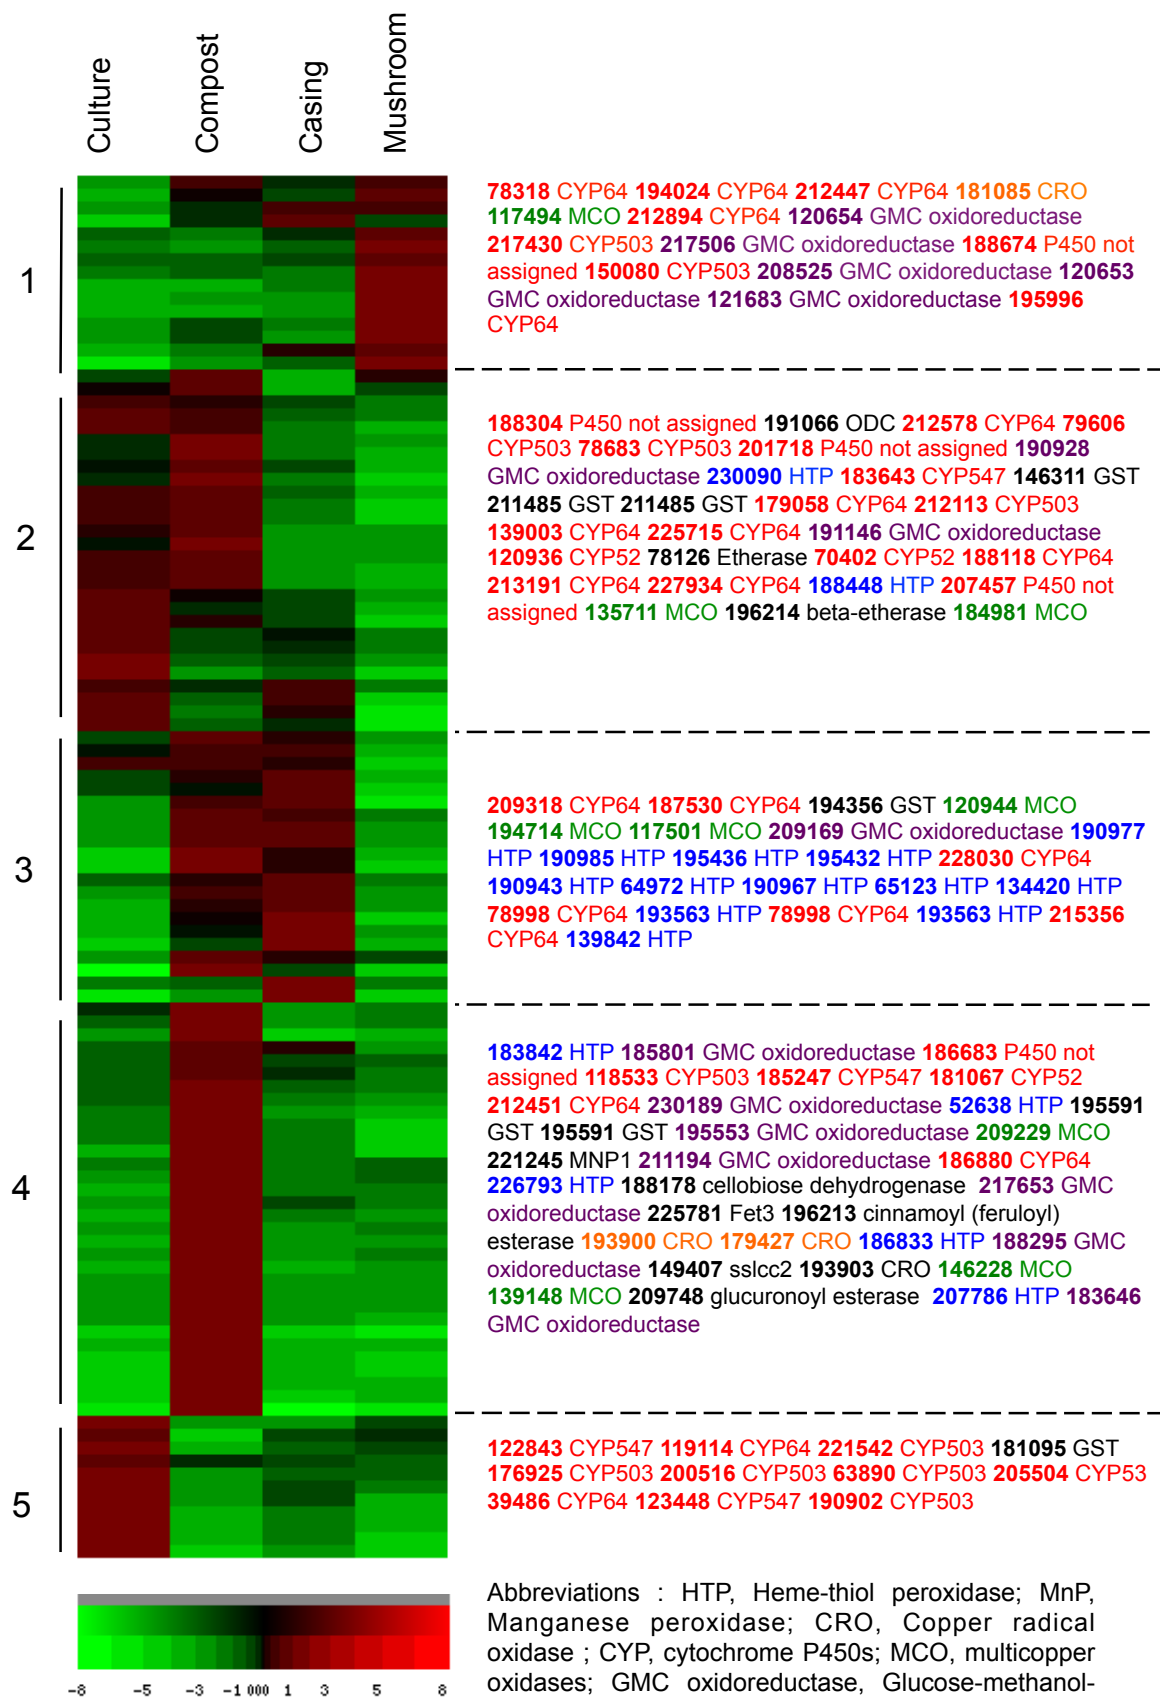

C. Transcripts coding for secreted proteases potentially involved in degradation of proteins.

MEROPS families are given on the right panel.

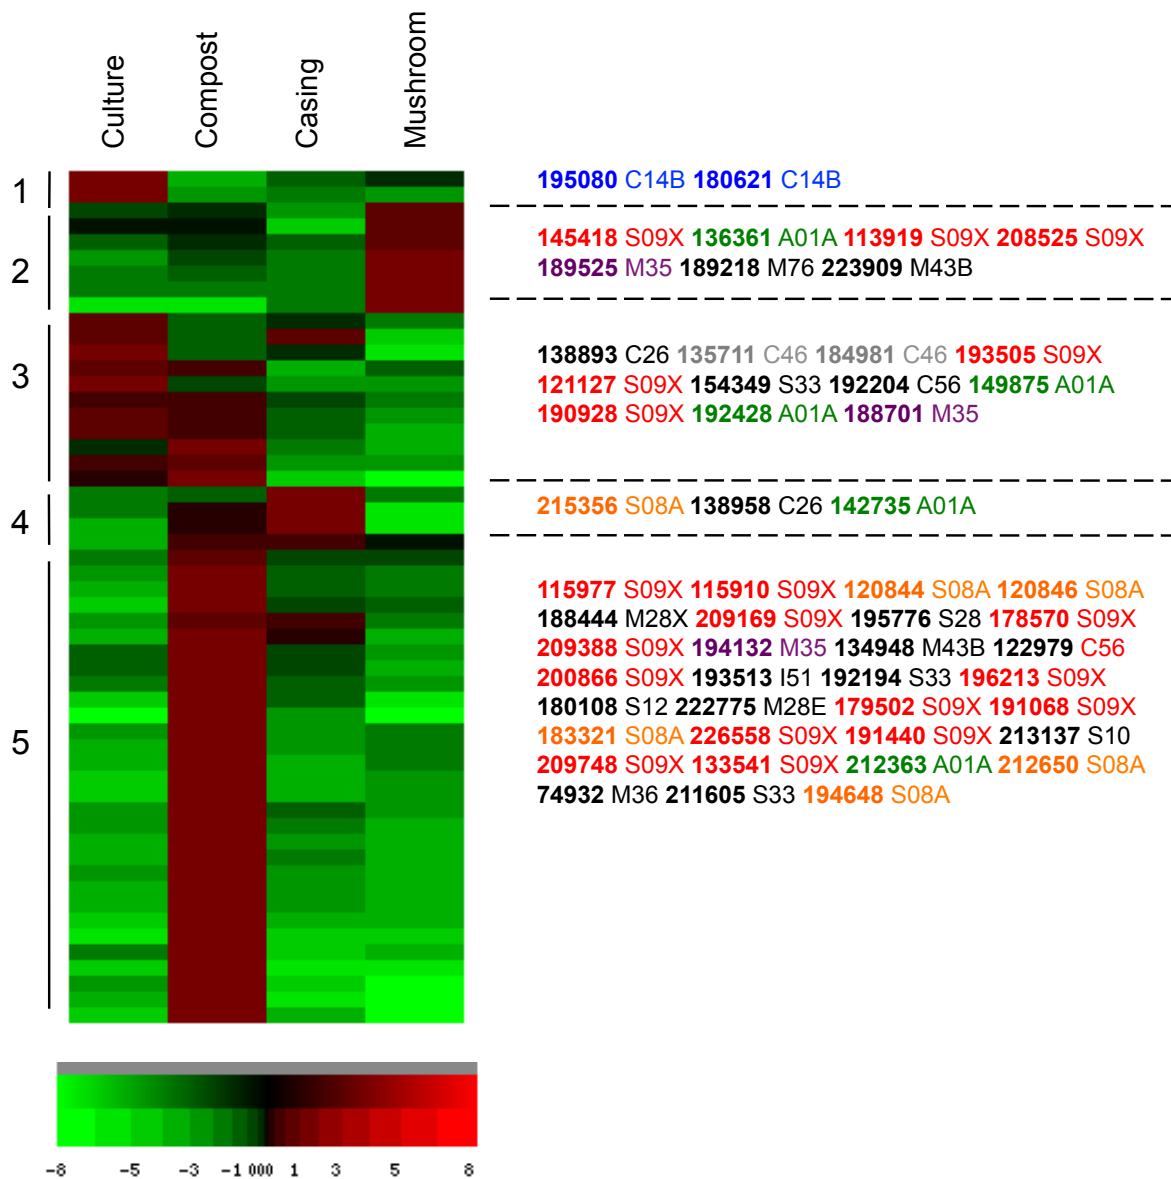

Transcripts significantly regulated (>5-fold; FDR, modified t-test <0.05) in minimum one of the conditions were included in the analysis. Relative expression indexes (REI) were calculated for the dataset. For each gene, a mean expression level was calculated from the four conditions, and the REI corresponds to the ratio between the expression level measured for a given condition and the mean reference. Log<sub>2</sub> transformed data were subjected to EPCLUST software (<http://www.bioinf.ebc.ee/EP/EP/EPCLUST/>) using correlation measure based distance (uncentered) and average linkage (UPGMA). In the boxes on the right of the cluster, the protein ID and the gene family of each transcript are presented. Transcripts from the same gene family are highlighted by the same color.

**Figure S7.** Growth of *A. bisporus* monokaryons (H39, H97) and dikaryon (U1) on various carbon sources with and without the addition of humic extracts. Growth was quantified by eye independently by two researchers and averaged. Differences between duplicate plates were less than 1 mm.

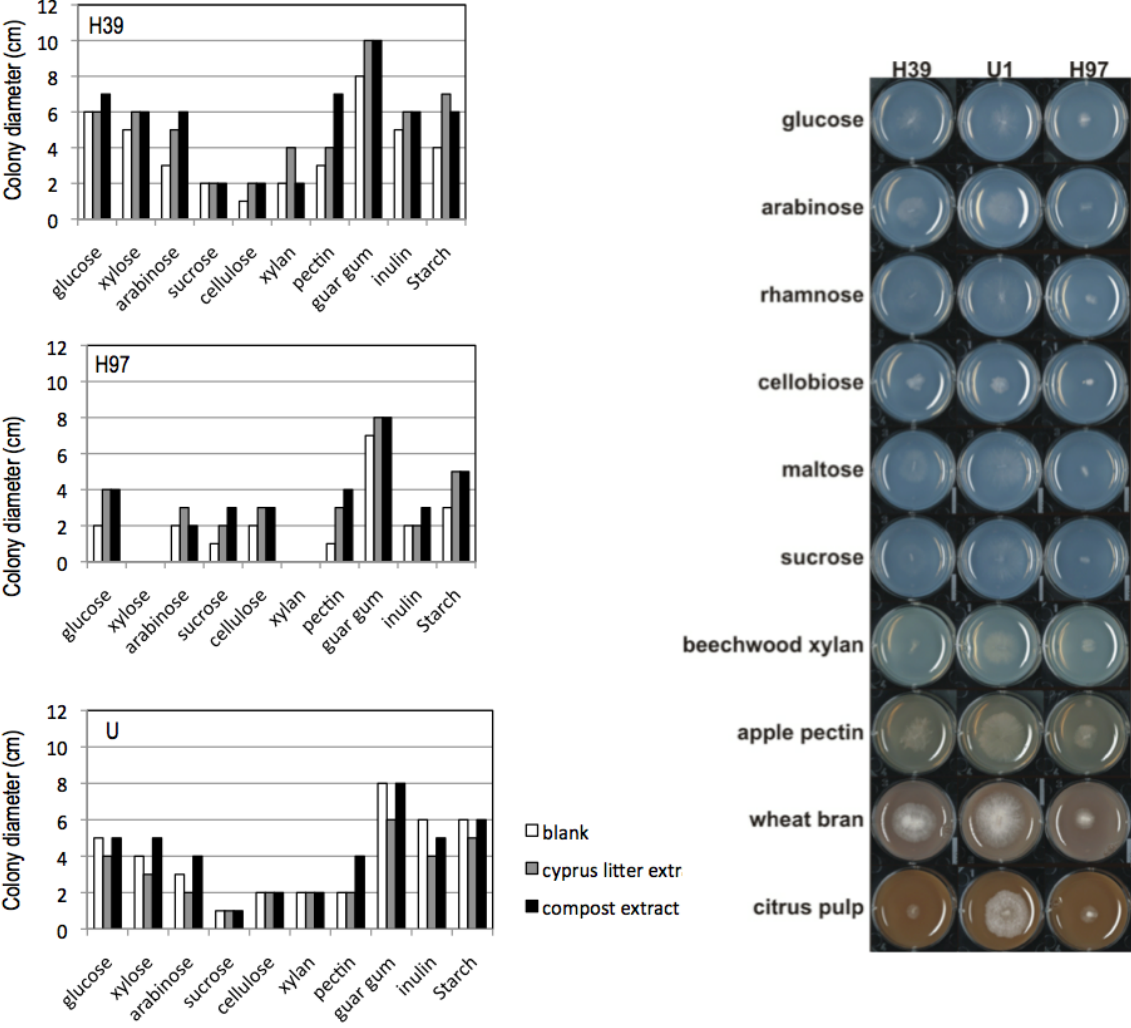

**Figure S8.** Double clustering of the CAZyme families from representative fungal genomes. Top tree: fungal species. Left tree: the enzyme families are represented by their class (GH, glycoside hydrolase; PL, polysaccharide lyase) and family number according to the CAZymes database (34). Right side: known substrate for the CAZy families (most common forms in brackets): BPG, bacterial peptidoglycan; BEPS, bacterial exopolysaccharides; CW, cell walls; E, energy storage and recovery; FCW, fungal cell walls; PCW, plant cell walls; PG, protein glycosylation; U, undetermined; a-gluc, a-glucans (including starch/glycogen); bglyc, b-glycans; b-1,3-gluc, b-1,3-glucans; cell, cellulose; chit, chitin/chitosans; dext, dextrans; hemi, hemicelluloses; inul, inulin; N-glyc, N-glycans; N-/O-glyc, N-/O-glycans; pect, pectins; suc, sucrose; and tre, trehalose. Abundance of the different enzymes within a family is represented by a color scale from 0 (white) to 44 occurrences (red) per species. In the top tree, black circles, plant and fungal pathogens; red squares, saprotrophs; white squares, white rots; orange circles, brown-rots; and green triangle, ectomycorrhizal symbiont.

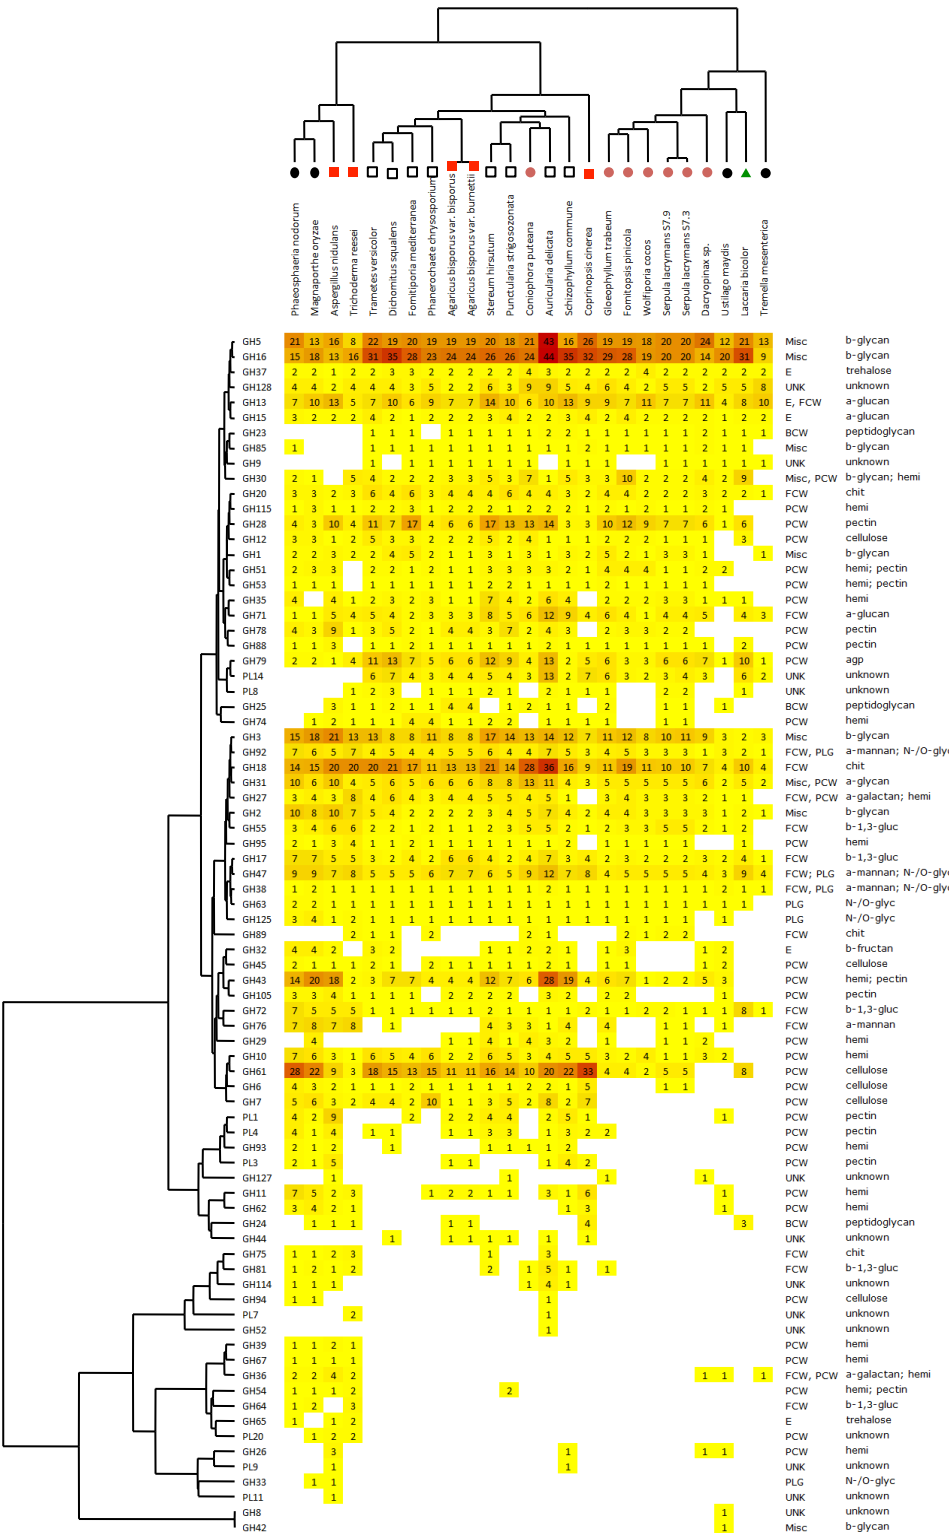

**Figure S9.** Distribution of genes coding for cellulose-degrading enzymes GH7 and GH61 in *Agaricus bisporus* var. *bisporus*, the coprophilous *C. cinerea*, white-rotters (WR), brown-rotters (BR), and ectomycorrhizal (MYC) fungi. **A**, Content in GH7 cellulase and **B**, GH61 cellulose ‘oxidoreductase’.

**A.**

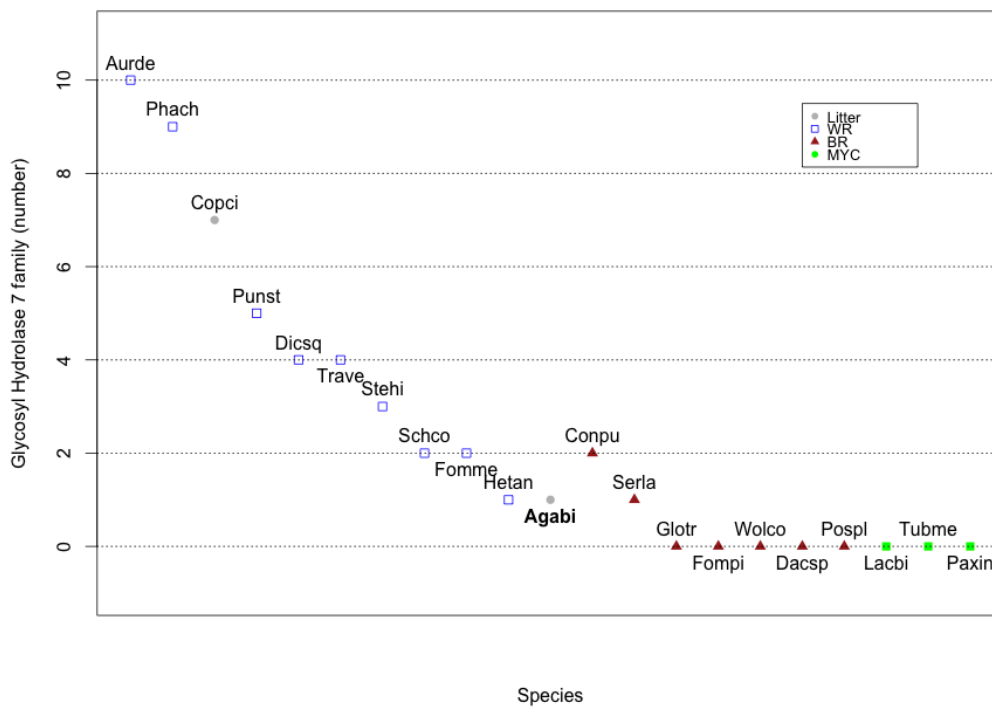

**B.**

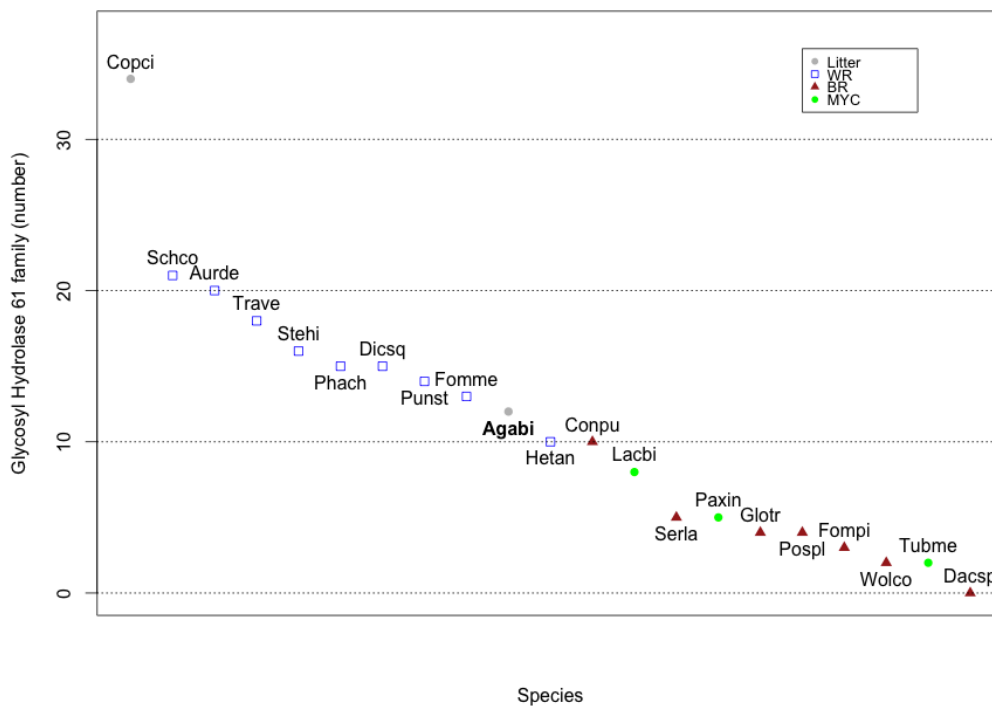

Abbreviations: AGABI, *A. bisporus*; AURDE, *A. delicata*; CONPU, *C. puteana*; COPCI, *C. cinerea*; DACSP, *D. spathularia*; DICSQ, *D. squalens*; FOMME, *F. mediterranea*; FOMPI, *F. pinicola*; GLOTR, *G. trabeum*; HETAN, *H. annosum*; LACBI, *Laccaria bicolor*; PAXIN, *P. involutus*; PHACH, *P. chrysosporium*; POSPL, *P. postia*; PUNST, *P. strigosus-zonata*; SCHCO, *S. commune*; SERLA, *S. lacrymans*; STEHI, *S. hirsutum*; TRAVE, *T. versicolor*; TUBME, *T. melanosporum*; WOLCO, *W. cocos*.

**Figure S10.** Correspondance Analysis on wood decay gene families. Dataset is built from 27 genes encoding oxidoreductases and carbohydrate active enzymes (CAZymes) known to degrade wood (Table S10). The black circle delimitate white-rotters, the brown one the brown-rotters. The blue dots show the proteins over represented in *A. bisporus* strains.

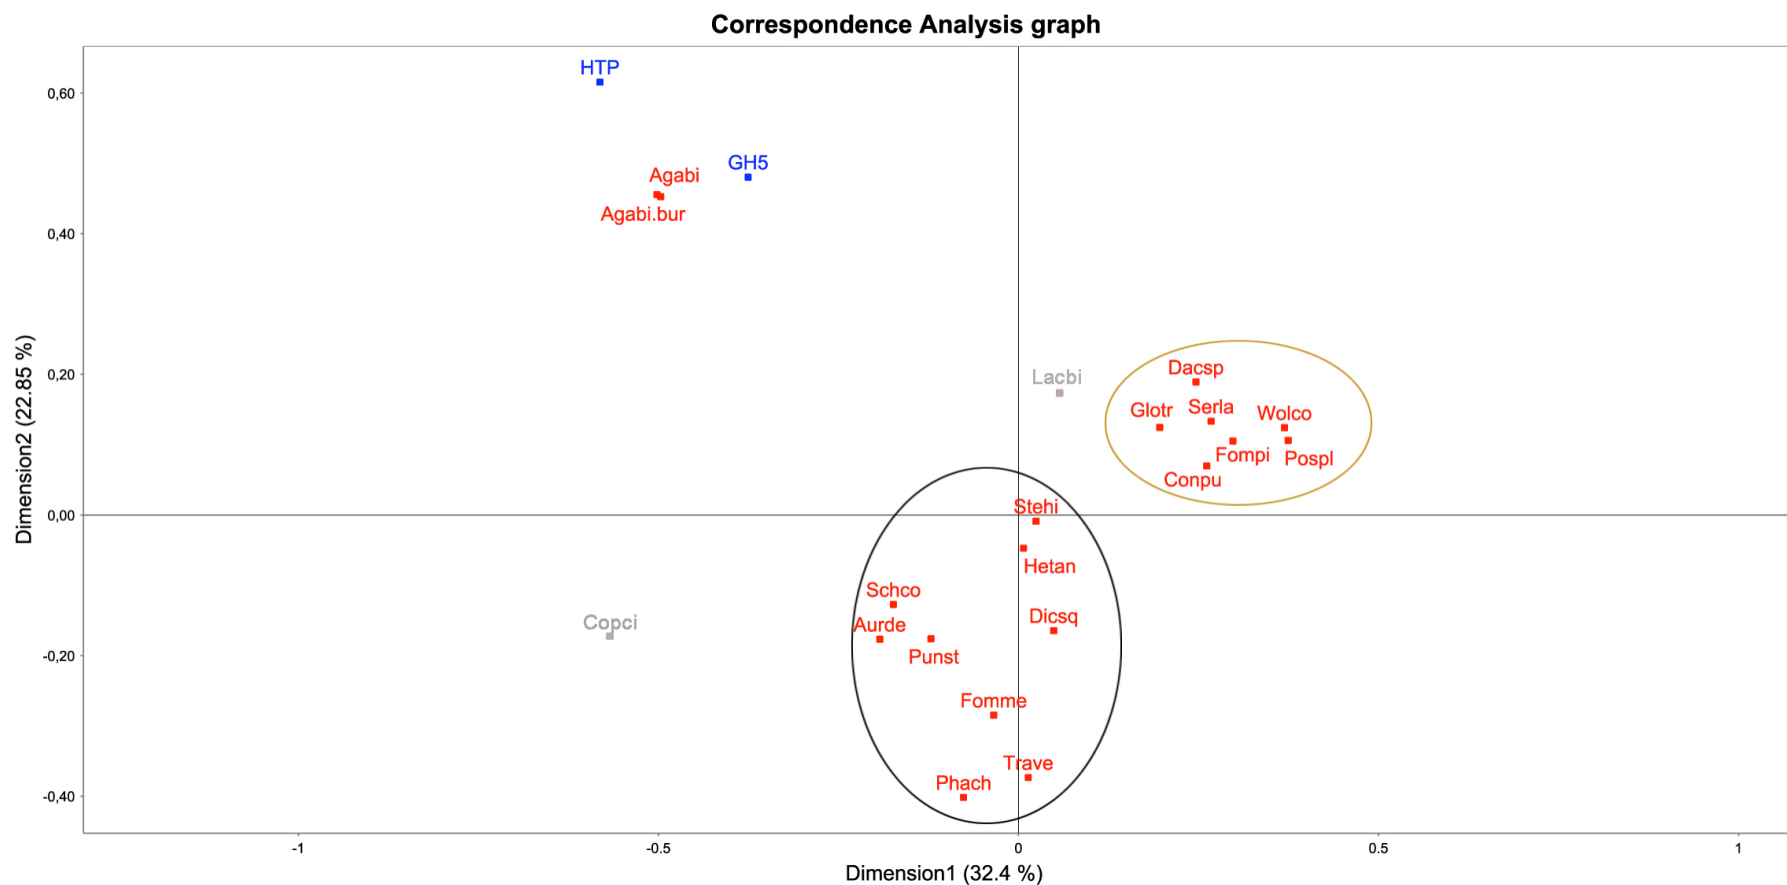

Abbreviations: Agabi, *A. bisporus* var *bisporus*; Agabi.bur, *A. bisporus* var *burnettii*; Aurde, *Auricularia delicata*; Copci, *C. cinerea*; Conpu, *C. puteana*; Dacsp, *Dacryopinax* sp.; Dicsq, *D. squalens*; Fomme, *F. mediterranea*; Fompi, *F. pinicola*; Glotr, *G. trabeum*; Hetan, *H. annosum*; Lacbi, *L. bicolor*; Phach, *P. chrysosporium*; Posp1, *P. placenta*; Punst, *P. strigosozonata*; Schco, *S. commune*; Stehi, *S. hirsutum*; Serla, *S. lacrymans*; Trave, *T. versicolor*; Wolco, *W. cocos*.



**Fig S11.** The phylogenetic distribution of Class-II-peroxidases in the *Agaricus* genome. We observed no significant expansion or contraction in *Agaricus* as compared to other litter-decomposing species (A). Numbers above branches refer to ancestral copy numbers as reconstructed by Notung under two edge-weight thresholds (separated by slash). Numbers following species names show the copy numbers of fPOX-s found in the genomes of these species. (B) Both varieties of *Agaricus bisporus* possess two copies of fPOX-s, which form two well-supported clades within the phylogeny of fPOX-s in Agaricomycetes, as shown on a maximum clade credibility chronogram inferred in BEAST 1.7.2. Thickened branches denote nodes with >0.95 posterior probabilities.

A

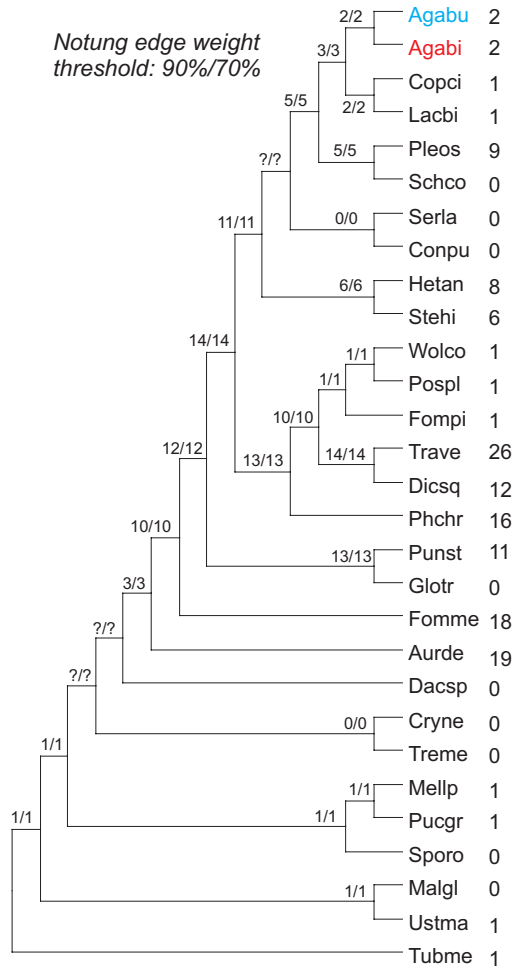

B

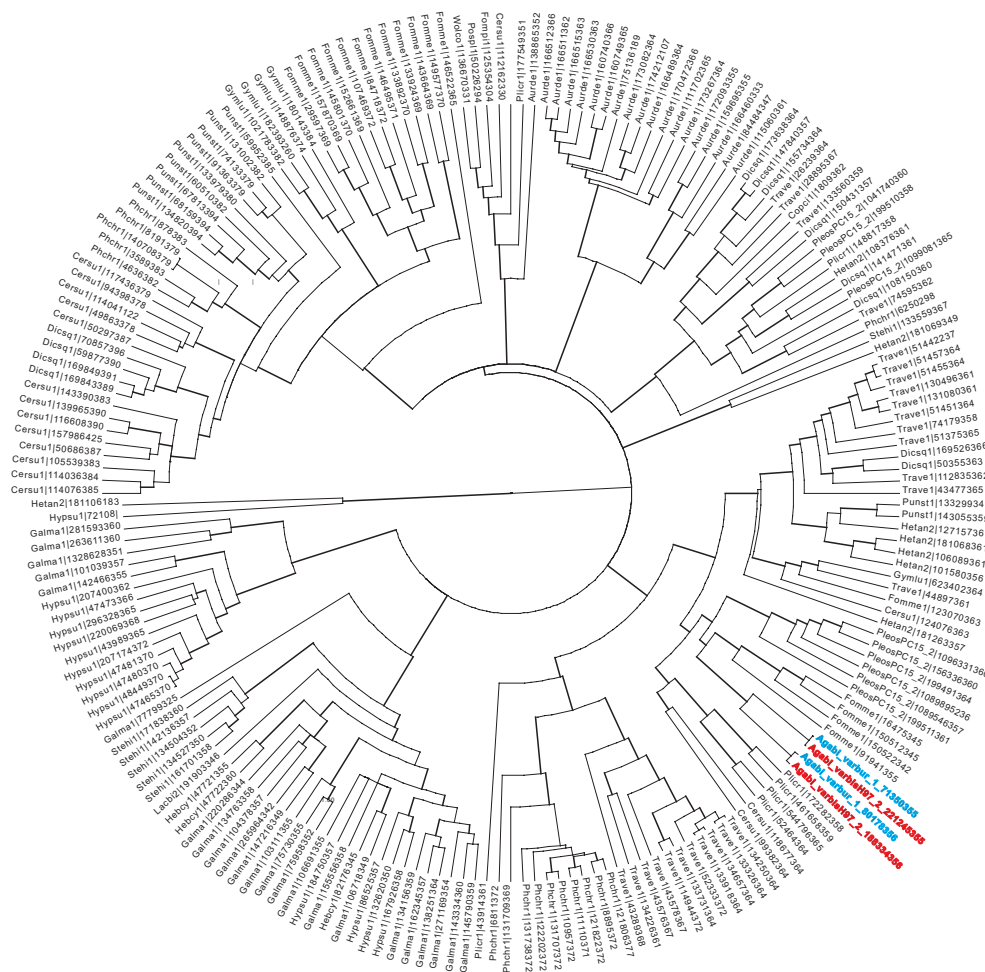

**Figure S12.** Regulation of genes coding for membrane transporters in *A. bisporus*. Heat map with hierarchical clustering of 333 gene models encoding transporters from *Agaricus bisporus* var. *bisporus*. Gene expression profiles of compost up-regulated genes encoding transporters show four clusters of peak expression. Cluster I contains transporters with gene expression up-regulated in mycelium cultured on compost or from fruiting body (FB). Cluster II, divided in two subgroups, contains transporters up-regulated in mycelium cultured on compost and casing medium. Cluster III comprises transporters up-regulated in mycelium cultured on compost and culture medium. For cluster IV which contains transporters transcripts specifically up-regulated in mycelium cultured on compost medium, a detailed overview of the proteins ID, the putative function and the expression in the different treatments are given in the table to the right of the heat map. Expression levels corresponding to the different treatments (casing, culture, fruiting body (FB) and compost) were converted to relative expression index (REI, expression level at a given treatment divided by the mean level across the treatments series) to help direct comparison of expression profiles. EPCLUST (<http://www.bioinf.ebc.ee/EP/EP/EPCLUST/>) and Log2-REI were used for the hierarchical clustering. REI levels range from pale to saturated colors (red for induction; green for repression). Black indicates no change in gene expression.

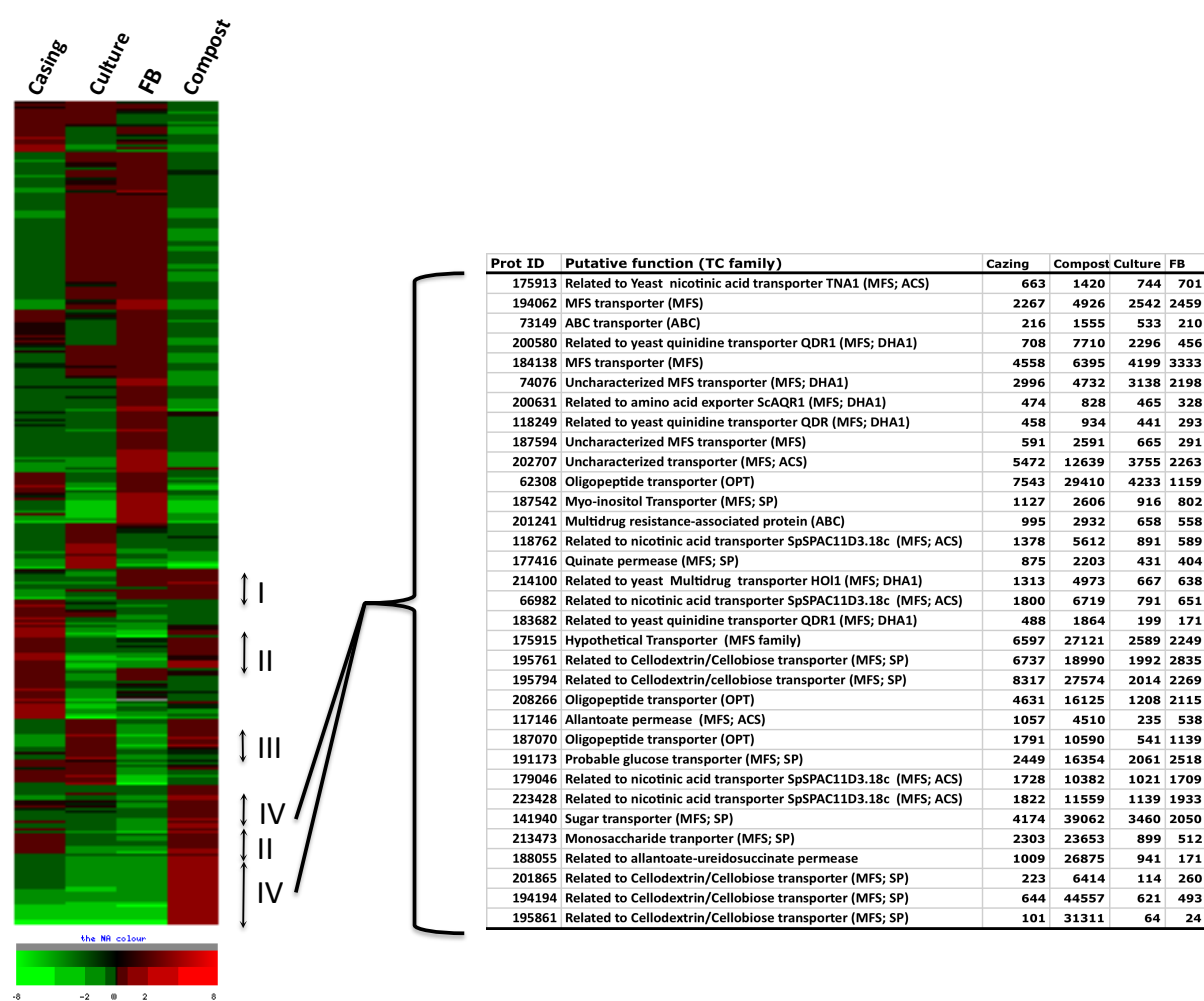

**Figure S13.** Gene regulation by humic substances. Microarray derived gene expression data were compared and ranked as ratios of expression in humic/non-humic environments (i.e. expression in compost/ Average expression in culture, casing and as fruitbodies) (see Table S15). The majority of compost-induced genes shared the promoter motif, TC[CA][TG]G[AT][GTA]A[AC]AATCTC; 31 occurrences of this motif was detected in 20 5'-regions of the top 33 up-regulated genes of *A. bisporus* var. *bisporus* grown on compost. The motif was discovered with the Motif-based sequence analysis tools (MEME Suite) 4.4 (<http://meme.sdsc.edu/>). It was also detected twice in the 5'-region of the laccase *lcc1* gene.

| Name                                   | Strand | Start | p-value  | Sites                                         |
|----------------------------------------|--------|-------|----------|-----------------------------------------------|
| Prom_Abu_130896_spr1                   | +      | 298   | 5.93e-09 | TGAAATCTCG <b>TCCGTGAAAATCTC</b> GGTTCCACCT   |
| prom_194648_SPR1                       | +      | 311   | 5.93e-09 | TGAAATCTCG <b>TCCGTGAAAATCTC</b> GGTTCCACCT   |
| Prom_226235                            | -      | 1522  | 4.73e-08 | GAGGGAAGAC <b>GCCGTGATAAAATCTC</b> TTCAGCTTTG |
| Prom_139148_lcc2                       | +      | 1419  | 9.69e-08 | ACCCGCGAAC <b>TCCGTGAAAAAATTTT</b> GGGCCATACA |
| Prom_192849                            | +      | 1377  | 2.59e-07 | GGTCCTCAAT <b>TCCGTGATACAATGTC</b> TTCTCGAGCT |
| Prom_Abu_79685_homol212650(H97)_serine | -      | 1019  | 4.53e-07 | GAAAAAGTAT <b>TCATGATACACTCTC</b> TAGAAAGGTA  |
| prom_212650_protase                    | -      | 1008  | 4.53e-07 | GAAAAACTAT <b>TCATGATACACTCTC</b> TAGAAGGTAA  |
| Prom_Abu_37296_homol68978_serine       | +      | 1157  | 6.87e-07 | CACAGATGGA <b>GCA TGAGACAATATC</b> GCGCTTTTAC |
| prom_68978_protase                     | +      | 1157  | 6.87e-07 | CACAGATGGA <b>GCA TGAGACAATATC</b> GCGCTTTTAC |
| Prom_79647                             | -      | 675   | 7.70e-07 | AGGGTGTGAT <b>TCCGGATAAAATCGC</b> GGGTGAATGG  |
| prom_146228_lcc1                       | +      | 1427  | 1.38e-06 | GCGCGTAAAC <b>TCCGTGAAAAAATTTT</b> GTGGATTGTG |
| Prom_183646                            | -      | 902   | 1.85e-06 | TTTTGTTGCT <b>TCATGTGAAAGGCTC</b> TCCGTCCGCT  |
| Prom_194576                            | +      | 1029  | 2.03e-06 | TATATGTGGA <b>TCAGGAAGAAATCTC</b> GGGGAATCTT  |
| Prom_190202_Cutinase                   | +      | 257   | 2.03e-06 | GTCTGACTTA <b>TCCGTTTAGAATGTC</b> GGAGAAGCAG  |
| Prom_Abu_85532_sslcc2                  | +      | 1148  | 4.01e-06 | TCGTCTCGTC <b>TTATGTGAAAATCTG</b> CAATGTCACA  |
| prom_149407_sslcc2                     | +      | 1145  | 4.01e-06 | TCGTCTCGTC <b>TTATGTGAAAATCTG</b> CAATGTCACA  |
| Prom_146117                            | +      | 862   | 4.36e-06 | GGTTGGTGAA <b>TCCGTGCAAAATCGC</b> TTCCCTGTTG  |
| Prom_194280_endocellulase              | +      | 1451  | 4.71e-06 | GTTCAACAAC <b>TCCGGACAAAAGCTC</b> CACAACTTTT  |
| Prom_227728                            | +      | 1130  | 5.93e-06 | GACCCFACCT <b>TCTTGGTAAAATCTC</b> GGTTTAGGTG  |
| prom_211295_alpha-amylase              | -      | 102   | 7.99e-06 | GGCTCAATTA <b>TCTTGAACAGTATC</b> ACGCGCGCCA   |
| Prom_190200                            | +      | 1461  | 8.61e-06 | TCTTCCAATGA <b>GCCGGATACAGTTT</b> CACATGAATA  |
| Prom_190390                            | -      | 1446  | 9.26e-06 | CTGTGAAGTC <b>TCCGGTAAAATCCG</b> TCAAGGGAGC   |
| Prom_195861                            | -      | 1070  | 1.14e-05 | ACGGCGGTGT <b>TACTGGAAAAATATC</b> GGATGATGTC  |
| Prom_194521                            | +      | 658   | 1.40e-05 | ACGTACGACA <b>TCATGGGAGATTTT</b> GAGACTTTTT   |

**Figure S14.** The expansion of HTP-s in *Agaricus bisporus*. Maximum Clade credibility chronogram of heme-thiolate peroxidases of the Agaricomycetes showing six independent lineages of HTPs in *Agaricus bisporus*. Branch lengths correspond to relative time. Thickened branches are strongly supported by Maximum Likelihood bootstrap and Bayesian posterior probabilities.

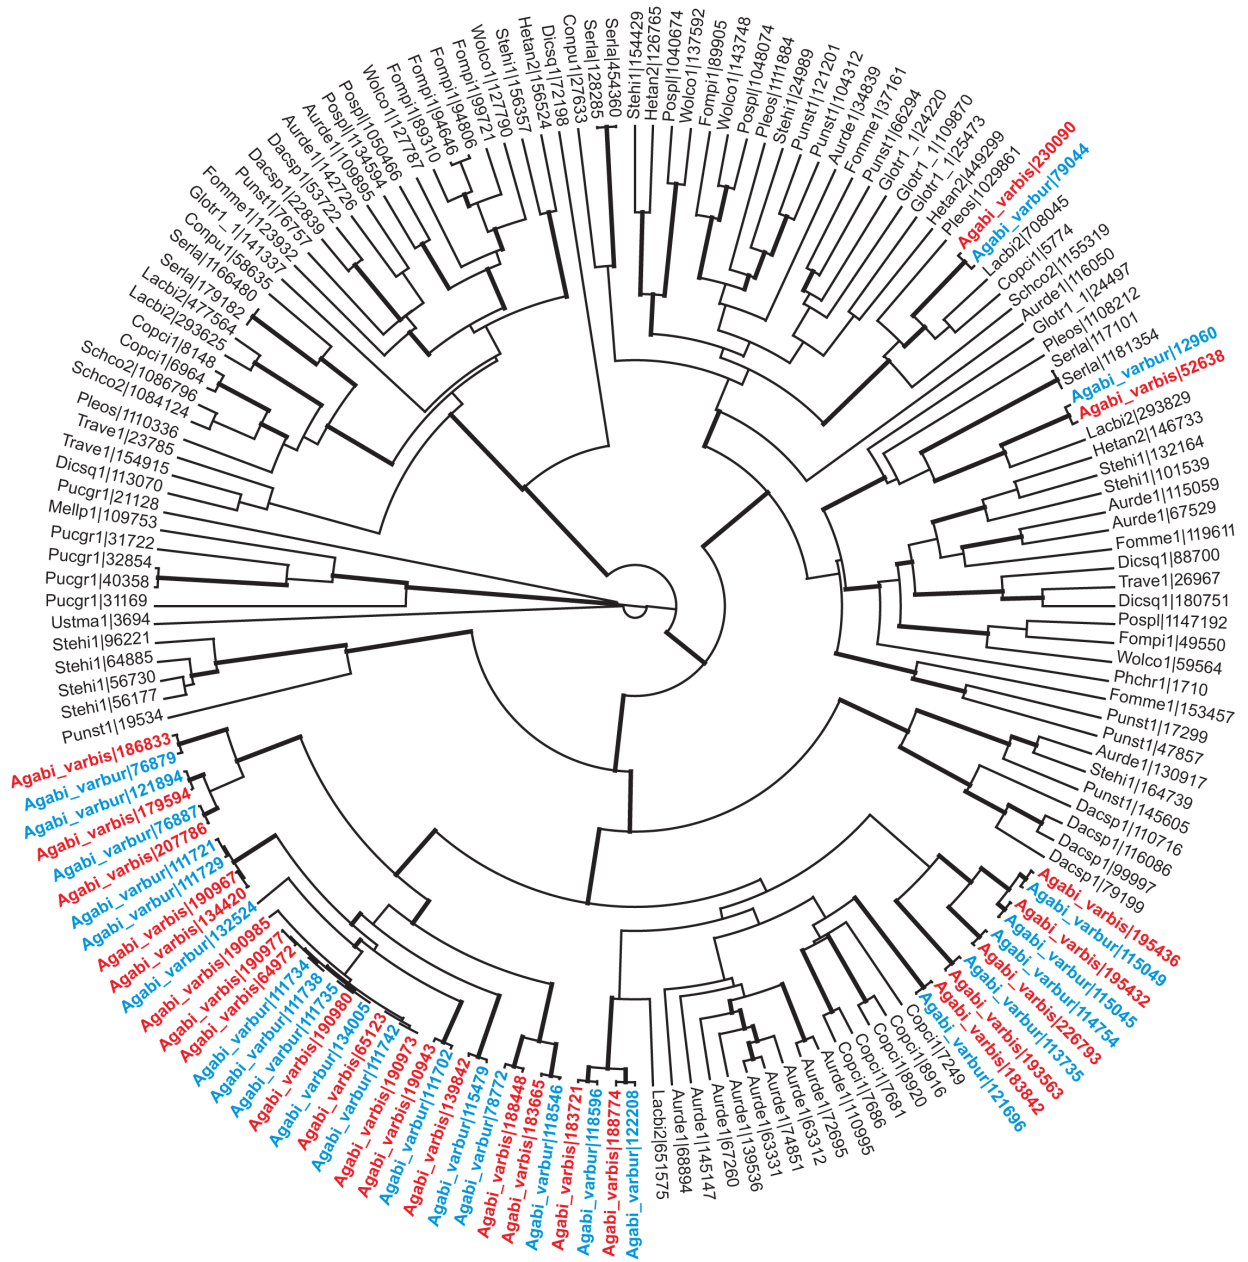

Supplement: 1206847109_sapp.pdf [file 1206847109_sapp.pdf]
